1 Short title: Auxin importer controls inflorescence architecture

2

3 **Pleiotropic and Non-redundant Effects of an Auxin Importer in Setaria and**  
4 **Maize<sup>1</sup>**

5

6 **Chuanmei Zhu<sup>2</sup>, Mathew S. Box, Dhineshkumar Thirupathi, Hao Hu, Yunqing Yu,**  
7 **Andrew N. Doust, Paula McSteen and Elizabeth A. Kellogg**

8

9 Donald Danforth Plant Science Center, 975 North Warson Rd, Saint Louis, MO, 63132, USA  
10 (C.Z., M.S.B., D.T., Y.Y. E.A.K.); Department of Plant Biology, Ecology, and Evolution,  
11 Oklahoma State University, Stillwater, OK 74078, USA (H.H., A.N.D.); Division of Biological  
12 Sciences, Interdisciplinary Plant Group, and Missouri Maize Center, University of Missouri, 301  
13 Christopher Bond Life Sciences Center, Columbia, MO 65211, USA. (P.M.)

14

15 <sup>1</sup>C.Z., M.S.B. and D.T. were supported by National Science Foundation (NSF) grant IOS-  
16 1413824 to E.A.K.

17 <sup>2</sup>Current address: Bayer Crop Science, St. Louis, MO

18 \*Address correspondence to Elizabeth A Kellogg, [ekellogg@danforthcenter.org](mailto:ekellogg@danforthcenter.org); Tel: (314) 587-  
19 1490

20 The author responsible for distribution of materials integral to the findings presented in  
21 this article in accordance with the policy described in the Instructions for Authors  
22 ([www.plantphysiol.org](http://www.plantphysiol.org)) is: Elizabeth A. Kellogg, [ekellogg@danforthcenter.org](mailto:ekellogg@danforthcenter.org).

23 E.A.K., C.Z. and M.S.B. designed the project. Experiments and data analysis were  
24 carried out by C.Z., M.S.B., D.T., H.H., A.N.D., and Y.Y. C.Z. drafted the paper with  
25 subsequent comments and review by E.A.K. and A.N.D. All authors read and approved the final  
26 manuscript.

27

28 One sentence summary: Mutations in a single auxin importer gene *Spp1/SvAUX1* uncover broad  
29 and unexpected effects in nearly all aspects of the development of shoots, inflorescences, and  
30 flowers.

31

32 **ABSTRACT**

33 Directional transport of auxin is critical for inflorescence and floral development in flowering  
34 plants, but the role of auxin influx carriers (AUX1 proteins) has been largely overlooked. Taking  
35 advantage of available AUX1 mutants in *Setaria viridis* and maize, we uncover previously  
36 unreported aspects of plant development that are affected by auxin influx, including higher order  
37 branches in the inflorescence, stigma branch number, and glume (floral bract) development, and  
38 plant fertility. However, disruption of auxin flux does not affect all parts of the plant, with little  
39 obvious effect on inflorescence meristem size, time to flowering, and anther morphology. In  
40 double mutant studies in maize, disruptions of *ZmAUX1* also affect vegetative development. A  
41 GFP-tagged construct of SvAUX1 under its native promoter showed that the AUX1 protein  
42 localizes to the plasma membrane of outer tissue layers in both roots and inflorescences, and  
43 accumulates specifically in inflorescence branch meristems, consistent with the mutant  
44 phenotype and expected auxin maxima. RNA-seq analysis finds that most gene expression  
45 modules are conserved between mutant and wildtype plants, with only a few hundred genes  
46 differentially expressed in *spp1* inflorescences. Using CRISPR-Cas9 technology, we disrupted  
47 *SPP1* and the other four *AUX1* homologs in *S. viridis*. SvAUX1/*SPP1* has a larger effect on  
48 inflorescence development than the others, although all contribute to plant height, tiller  
49 formation, leaf, and root development. The AUX1 importers are thus not fully redundant in *S.*  
50 *viridis*. Our detailed phenotypic characterization plus a stable GFP-tagged line offer tools for  
51 future dissection of the function of auxin influx proteins.

52

53 The plant hormone auxin is a mobile signal that is transported between cells by both influx and  
54 efflux proteins (Naramoto, 2017). It is involved in organ initiation and growth in all parts of the  
55 plant and is particularly well known for its effects on branching (Gallavotti, 2013; Taylor-  
56 Teeple et al., 2016; Naramoto, 2017; Olatunji et al., 2017; Korver et al., 2018). Efflux proteins,  
57 particularly homologs of PIN-FORMED1 (PIN1) (Petrásek et al., 2006; Balzan et al., 2014;  
58 Naramoto, 2017), have been studied extensively in many plant species, with particular attention  
59 in *Arabidopsis*, long the model of choice for studies of auxin function. As a result, much has  
60 been discovered about the flow of auxin out of cells (e.g. (Verna et al., 2019)) and how auxin  
61 gradients are established throughout the plant (e.g. (Heisler et al., 2005; Wang and Jiao, 2018)  
62 and many others).

63 In contrast, the flow of auxin into cells (auxin influx) has received much less attention,  
64 particularly in reproductive organs. In *Arabidopsis* single-gene mutants of any of the four auxin  
65 influx carriers (*AUX1* and *LAX1-3*) have normal above-ground structures and higher order  
66 mutants affect only leaf phyllotaxis (Kleine-Vehn et al., 2006; Bainbridge et al., 2008; Peret et  
67 al., 2012; Swarup and Péret, 2012). Perhaps because of this subtle mutant phenotype, far less is  
68 known about influx than efflux, especially as regards vegetative and inflorescence development.  
69 Also the *AUX1/LAX* genes in *Arabidopsis* are more closely related to each other than any of them  
70 is to the *AUX1-like* genes known in grasses (Huang et al., 2017). This lack of one-to-one  
71 correspondence, in addition to the lack of a strong phenotype in *Arabidopsis*, prevents direct  
72 extrapolation from *Arabidopsis* to any monocot, particularly cereal crops and their relatives.

73 A recently identified mutation in an auxin influx carrier in the model grass *Setaria*  
74 *viridis*, *SPARSE PANICLE1* (*SPP1*) (Huang et al., 2017), offers an opportunity to uncover novel  
75 aspects of auxin influx disruption. *SPP1* is homologous to the maize protein *ZmAUX1* and to the  
76 four *Arabidopsis* *AUX1* proteins, but unlike in *Arabidopsis*, the *spp1* mutation (presumed to  
77 abolish gene function) causes an obvious defect in the inflorescence, thus providing a system in  
78 which the effects of disrupting influx are easily seen. *SPP1* was named for the wide spacing of its  
79 primary inflorescence branches, and its role in auxin transport was supported by observation of  
80 clearly agravitropic roots (Huang et al., 2017). However, few other aspects of plant growth and  
81 development were considered in the original paper, including many that would be expected to  
82 require normal auxin transport. For example, the *S. viridis* inflorescence typically exhibits many  
83 orders of branches, some of which produce spikelets and others that end blindly (known as

84 bristles; see (Doust and Kellogg, 2002)). Disruption of SPP1 should affect these higher order  
85 branches and the balance of spikelet-bearing branches and bristles, as well as other aspects of  
86 above-ground architecture such as tillering and relevant gene expression.

87 AUX1 mutants have been reported in other grasses (maize, rice, and *Brachypodium*) but  
88 these studies focused on roots (Yu et al., 2015; Zhao et al., 2015; Huang et al., 2017; van der  
89 Schuren et al., 2018), which were agravitropic in all species consistent with disruption of auxin  
90 pathways. In addition, the rice mutants had fewer lateral roots (Yu et al., 2015; Zhao et al.,  
91 2015), whereas the *S. viridis* mutants had a normal number (Yu et al., 2015; Zhao et al., 2015;  
92 Huang et al., 2017; van der Schuren et al., 2018). Neither Yu et al. (2015) nor Zhao et al. (2015)  
93 reported changes in the inflorescence in rice *OsAUX1* mutants. In *Brachypodium distachyon*,  
94 *bdaux1* mutants are sterile and some above-ground structures are affected, but the phenotypes are  
95 not described in detail (van der Schuren et al., 2018). Thus the role of AUX1 in above-ground  
96 development remains largely unexplored, especially in grasses and cereal crops.

97 Here we show that mutations in *SPP1* (=SvAUX1) and its homolog in maize affect many  
98 shoot phenotypes including development of the gynoecium and floral bracts (glumes); these are  
99 not side-effects of meristem size variation or differences in developmental timing. Based on the  
100 phenotypes of higher-order mutants involving all five *S. viridis* AUX1-like loci, we show that  
101 SPP1/SvAUX1 is not redundant with the other loci and is the major one controlling inflorescence  
102 architecture. *ZmAUX1*, investigated because of the wealth of auxin-related mutants in maize,  
103 enhanced the mutant phenotypes of several auxin pathway genes and revealed an unexpected  
104 enhanced effect on leaf number. In *S. viridis*, SPP1 was internally tagged, and localized to the  
105 plasma membrane of epidermal cells in inflorescence branch meristems and roots. Only a few  
106 hundred genes, including several known to be involved in inflorescence development, are  
107 differentially expressed between *spp1* and wildtype inflorescences, indicating highly specific  
108 changes in the transcriptome.

109  
110

## 111 RESULTS

### 112 *spp1* affects tillering, inflorescence branching, gynoecium development, and root hair 113 formation

114 Mutations in SPP1 affect many aspects of plant development having to do with growth and  
115 branching (Fig. 1; Table S1). In addition to the eponymous sparse panicle phenotype (Fig. 1A-  
116 1C), mutant plants were significantly shorter than wildtype (Fig. 1A, 1D) and produced more  
117 tillers (Fig. 1A, 1E). Mutant panicles were significantly longer than wildtype (Fig. 1B, 1C, 1F),  
118 but the increased length did not result in higher yield. Instead, mutants had fewer spikelets at  
119 maturity (Fig. 1G) and fewer of these were fully developed and fertile (Fig. 1H). The reduced  
120 number and fertility of spikelets was not caused by a developmental delay; the transition to  
121 reproductive growth and flowering in *spp1* mutant plants was only slightly later than in A10.1  
122 (Fig. S1A, S1B), and barely significant. Fertile florets (upper lemma+palea) were significantly  
123 larger in the mutant (Fig. S1C) but percent germination did not differ (Fig. S1D). Culms  
124 (peduncles) were generally thinner in the mutant but overall culm anatomy was similar (Fig.  
125 S1E-S1G).

126 The lower density of spikelets and bristles (fewer of each per cm; Fig. 1I, 1J) could  
127 reflect a reduced density of primary branches (observed in early development; see next section)  
128 and/or a change in the numbers of spikelets and bristles per branch; the latter would indicate an  
129 effect of the mutation on secondary and higher order branches. In mutant panicles the primary  
130 branches have about the same number of spikelets as in wildtype (Fig. 1K, 1N, 1O), but  
131 significantly fewer bristles (Fig. 1L, 1N-1P) and therefore a lower ratio of bristles to spikelets  
132 (Fig. 1M-1P). In addition, about 15% of branches in *spp1* had one or a few spikelets at the  
133 terminus of a long branch without additional bristles, compared to <1% of A10.1 branches (Fig.  
134 1P). Together these observations suggest that the *spp1* mutation affects both the formation of  
135 higher order branches and the specification of those branches as spikelets or bristles.

136 Floral morphology and early development are affected in *spp1* mutants and are likely to  
137 be at least partially responsible for the fertility defects of the mutant (Fig. 2; Table S1). At 18  
138 days after sowing (DAS) when the anthers and gynoecium were first visible in both A10.1 and  
139 *spp1*, glumes in the wildtype were shorter than the flowers (Fig. 2A), whereas those in the  
140 mutants were unusually long, nearly enclosing the flowers (Fig. 2B). In addition, the mutants  
141 had fewer branches, bristles, and spikelets at this stage, consistent with the reduced number of

142 bristles per spikelet at maturity (Fig. 1M). Gynoecium formation was also abnormal in *spp1*,  
143 with mutants often having fewer than two styles, the normal number in wildtype (Fig. 2C-2G).  
144 Stigmas in *spp1* plants, when present, were significantly less branched than in wildtype (Fig. 2H-  
145 2J); Table S1). Other than the abnormal glume and gynoecium development, all spikelets in both  
146 genotypes had the expected number of glumes (two) and florets (two), with lemmas, paleas,  
147 lodicules and stamens developing apparently normally in both mutant and wildtype plants (Fig.  
148 2D-2F).

149 Neither primary root length nor lateral root number was obviously altered in *spp1* (Fig.  
150 S1N), but root hair density was significantly lower on both primary and lateral roots in *spp1*  
151 compared to A10.1 (Fig. S1H, S1I, S1L, S1M; Table S1). In addition, the distance from root tip  
152 to the first root hair initiation site was significantly longer in mutant roots (Fig. S1J, S1K).

153 By applying synthetic auxins to roots, we showed that SPP1 could potentially function in  
154 auxin import. In response to a mock auxin treatment, *spp1* roots were agravitropic (Fig. S2A,  
155 S2B), as expected (Huang et al., 2017), and had fewer root hairs than wildtype (Fig. S2G, S2H).  
156 2,4-Dichlorophenoxyacetic acid (2, 4-D), which requires auxin importer proteins to move into  
157 the cells, could not rescue the mutant phenotypes in roots, consistent with our hypothesis that  
158 SPP1 is a *bona fide* auxin importer (Fig. S2C, S2D, S2I, S2J, S2M). In contrast, the lipophilic  
159 auxin 1-Naphthaleneacetic acid (NAA), which can diffuse freely across the plasma membrane,  
160 restored both the gravitropic response of *spp1* roots (Fig. S2E, S2F) and also the normal density  
161 of root hairs (Fig. S2K-S2M).

162

### 163 **SPP1 controls inflorescence branch initiation, elongation, and identity, but not meristem** 164 **size**

165 To explore whether the sparse panicle phenotype in *spp1* resulted from branch initiation  
166 defects linked to abnormal meristem size, we imaged early inflorescence development with  
167 scanning electron microscopy (SEM)(Fig. 3A-3N; Table S2). Meristem height (the vertical  
168 distance from the uppermost branch primordium to the apex of the meristem) dropped  
169 significantly between 11 and 12 DAS and again between 12 and 13 DAS, but wildtype and  
170 mutant inflorescences did not differ at any stage of development (Fig. 3O). Meristem width was  
171 unchanged in either genotype over 10-12 DAS, then dropped significantly in both genotypes  
172 between 12 and 13 DAS (Fig. 3P); by 14 DAS, *spp1* inflorescences were wider than those in

173 wildtype (Fig. 3P). Overall length of inflorescences before 14 DAS scarcely differed between  
174 *spp1* and wildtype (Fig. 3A-4N, 3Q), indicating that the length difference at maturity was  
175 established later in development and probably reflected rachis elongation rather than branch  
176 initiation. By 12 DAS, primary branch number in *spp1* was significantly lower than in A10.1,  
177 whether counting branches per vertical row (Fig. 3R), or all visible branches on one side of the  
178 inflorescence (Fig. 3S). In contrast to A10.1, which produced primary branch meristems in a  
179 spiral pattern around the inflorescence meristem (Fig. 3A-3E, 3K, 3L), *spp1* often failed to  
180 initiate a branch meristem or produced unusually large primary branch meristems (Fig. 3F-3J,  
181 3M, 3N). While primary branch meristems produced distichous secondary branch meristems in  
182 A10.1 (Fig. 3C-3E, 3K, 3L), secondary branches often initiated asymmetrically in *spp1* (Fig. 3H-  
183 3J, 3M, 3N).

184 *spp1* was defective in branch elongation and meristem fate determination. Branch  
185 primordia in *spp1* elongated more than those in A10.1 (Fig. 3A-3N). While most bristles in  
186 A10.1 had lost their meristematic tip completely by 16 DAS (Fig. 3L), bristles often retained  
187 their meristem in *spp1* (Fig. 3N) even at 18 DAS (Fig. 2A, 2B).

188

### 189 **The *Spp1* ortholog in maize, *ZmAux1*, enhances effects of auxin-related genes**

190 Because *S. viridis* lacks a set of auxin-related mutants, we used maize to test genetic  
191 interactions of AUX1 with other loci. The mutant for the *SPP1* ortholog in maize, *zmaux1*,  
192 produced fewer branches in the tassel and fewer spikelets per row in the ear and tassel compared  
193 to the wildtype (W22 inbreds) and heterozygous controls (Table S3), a phenotype analogous to  
194 that in *S. viridis* (Fig. 4A-4G). Also like *S. viridis*, the mutation had no obvious effect on  
195 inflorescence meristem sizes (Fig. 4A-4F). Spikelets in *Zea* occur in pairs, with a pair generally  
196 interpreted as a short lateral branch (Vollbrecht et al., 2005; Whipple, 2017). Therefore if  
197 *zmaux1* affects higher order branches in the inflorescence, it should affect whether both members  
198 of the pair initiate and indeed *zmaux1* showed more single and fewer paired spikelets in both ear  
199 and tassel (Fig. 4A-4F, 4H; Table S3). The tips of *zmaux1* ears were often elongated as were  
200 some individual spikelets themselves (Fig. 4E), similar to the spikelet-tipped bristles in the *spp1*  
201 mutant. Thus *SPP1* controls branch initiation, elongation and fate determination, but not  
202 inflorescence meristem size, in both *S. viridis* and maize.



203 We crossed three well-characterized auxin mutants in maize to *zmaux1*, guided by the  
204 presumed pathway shown in Fig. 5A based on their biochemical functions. These included an  
205 auxin biosynthesis mutant (*vanishing tassel 2* (*vt2*), encoding a grass-specific tryptophan  
206 aminotransferase) (Phillips et al., 2011), a regulator of auxin efflux (*barren inflorescence 2*  
207 (*bif2*), encoding a serine/threonine kinase co-orthologous to PINOID in Arabidopsis) (McSteen  
208 et al., 2007; Pressoir et al., 2009), and an auxin signaling protein (*Barren inflorescence 4* (*Bif4*),  
209 encoding an AUXIN/INDOLE-3-ACETIC ACID (Aux/IAA) protein) (Galli et al., 2015).

210 Plants with the mutant allele *zmaux1* had reduced branching in the ear and tassel in all  
211 three mutant families (*vt2*, *bif2*, *Bif4*)(Figs. 5B-5G, S3-S5). Kernel number, reflecting the total  
212 number of spikelets and hence the total number of branches, was also significantly reduced by  
213 the *zmaux1* single mutant in all mutant families, although traits that might contribute to total  
214 kernels (ear row number, spikelets per row) were not significantly lower in all cases, probably  
215 due to small sample size (Table S3; Figs. S3D, S4D, S5D). Number of tassel branches was also  
216 significantly lower in all cases, but the number and density of spikelets on the main spike of the  
217 tassel was not always affected. In contrast, tassel length, height of the flag leaf, and total number  
218 of leaves were not significantly different for *zmaux1* mutants (Table S3; Figs. S3-S5).

219 The effect of the double mutants on inflorescence characteristics is consistent with what  
220 we know about the function of the underlying genes. The locus defective in auxin biosynthesis,  
221 *vt2*, almost completely abolished branching in both the tassel and ear and suppressed growth of  
222 the tassel, thereby completely obviating any effect of *zmaux1*. *vt2* single mutants were  
223 indistinguishable from *zmaux1;vt2* double mutants for these traits (Fig. 5B, S3B-S3G).  
224 Likewise, BIF2 phosphorylates the auxin efflux carrier ZmPIN1 and its mutation blocks  
225 inflorescence branching, presumably by preventing auxin efflux (Skirpan et al., 2009). *bif2*  
226 single mutants were also indistinguishable from the *zmaux1;bif2* double mutant for the same  
227 branching traits as *vt2* (Fig. S4B-S4G). *Bif4* encodes a protein involved in auxin signaling and  
228 creates a less severe defect in branching than *vt2* and *bif2* (Fig. S5). The *Bif4* mutant phenotype  
229 is significantly enhanced in the *zmaux1;Bif4* double mutant for kernel number, tassel branch  
230 number, and density of spikelets on the main spike of the tassel, although the effect on ear row  
231 number, spikelets per row, and spikelets on the main spike was non-significant (Fig. S5B-S5G).

232 The double mutants had an unexpected effect on vegetative characteristics. The *vt2* and  
233 *bif2* mutations led to slight but non-significant reductions in flag leaf height and leaf number, an



234 effect that was clearly enhanced by *aux1*; the phenotype of the double mutants *zmaux1;vt2* and  
235 *zmaux1;bif2* was significantly more severe than either single mutant (Fig. S3I, S3J, S4I, S4J).  
236 The vegetative traits in the *Bif4* family were even more striking in that neither *zmaux1* nor *Bif4*  
237 single mutants had a significant effect but leaf number and height of the flag leaf were reduced in  
238 double mutants (Fig. S5I, S5J). The synergistic effect in double mutants involving all three  
239 auxin-related genes indicated that *zmaux1* does indeed function in the auxin pathway, and  
240 moreover that auxin import has a role in normal leaf organogenesis.

241

### 242 **SPP1 localizes to epidermal cells in branch meristems in the inflorescence**

243 SPP1 was localized in the *S. viridis* inflorescence using a translational fusion with a green  
244 fluorescent protein (GFP) fused to SPP1 (SPP1~iGFP) in an internal facing (cytoplasmic) N-  
245 terminal hydrophilic loop of SPP1 (Fig. S6A). We initially placed *SPP1~iGFP* under a  
246 constitutive promoter (*proPvUBI1::SPP1~iGFP*) to check its integrity with transient expression  
247 assays in tobacco leaves. SPP1~iGFP localized preferentially to a thin line at the periphery of  
248 epidermal cells, consistent with plasma membrane (PM) localization (Fig. S6B-S6D).

249 SPP1~iGFP localization is consistent with its routing through the secretory pathway to  
250 the plasma membrane as well as the nuclear membrane. Using tissue culture transformation, we  
251 introduced our *SPP1~iGFP* construct driven by its native promoter (*proSPP1::SPP1~iGFP*) to  
252 *spp1* mutants, validated three independent events by PCR genotyping, and selected one  
253 containing an expressed transgene (*spp1\_T*) for further characterization (Fig. S7A, S7B).  
254 Confocal imaging in the T3 generation showed that in developing inflorescence, emerging  
255 leaves, and roots, GFP signals were mostly on the cell periphery of outer epidermal layers (Fig.  
256 6A-6F, S6E-S6J). SPP1~iGFP in leaves colocalized with FM4-64, a marker of the plasma  
257 membrane, confirming that the peripheral location of the signal indeed came from the membrane  
258 (Fig. 6D-6F). SPP1~iGFP was also visible in a fine perinuclear line, likely to be the nuclear  
259 membrane (Fig. 6C, S6H, S6I), and in transcellular strands extending from the nucleus to the  
260 plasma membrane (Fig. 6C).

261 SPP1~iGFP appeared at the presumed initiation site for all branch meristems, both  
262 primary and secondary. SPP1~iGFP was visible on the side of IM at about 1-2 days after IM  
263 formation (Fig. 6G, Video S1), likely marking the position of the youngest primary branch  
264 meristem. Expression decreased or disappeared in older IMs and older branch meristems (Fig.

265 6H, Video S2). Consistent with the expression pattern, *SPP1*~iGFP partially rescued defects in  
266 *spp1* inflorescences (Fig. S7C-S7I; Table S4), although the effect of the transgene was only  
267 significant for panicle length (Fig. S7F) and spikelets per primary branch (Fig. S7H). It also  
268 rescued the agravitropic root phenotype of *spp1* (Fig. S7J, S7K). Partial rescues are common and  
269 are thought to reflect the failure of the transgene to completely mimic endogenous gene  
270 expression (Stam et al., 1997).

271

### 272 ***SPP1* affects expression of inflorescence developmental genes**

273 We used RNA-seq to compare gene expression in A10.1 and *spp1* inflorescences at 10, 12 and  
274 14 DAS (see Fig. 3, Tables S5-S7); transcripts were clustered with WGCNA (Langfelder and  
275 Horvath, 2008). Among the 10,434 transcripts in the analysis, we identified seven co-expression  
276 modules in A10.1 inflorescences and ten in *spp1* (Fig. S8). None of the modules was genotype-  
277 specific and most were strongly preserved between genotypes (Fig. S9). For example, the largest  
278 module in A10.1 (turquoise) included 6650 transcripts with low expression at 10 DAS, moderate  
279 at 12, and high expression at 14 DAS; 5,571 of these transcripts fell into either the turquoise or  
280 blue modules in *spp1*, which showed a similar overall pattern (Fig. S8, S9B). Most GO terms  
281 were comparable between the two genotypes, but the terms “cellular response to auxin stimulus”,  
282 “response to gibberellin” and “regulation of abscisic acid-activated signaling pathway” showed  
283 differential enrichment (Fig. S10).

284 Consistent with the high conservation of the WGCNA expression modules, relatively few  
285 transcripts were differentially expressed between A10.1 and *spp1*. At 10 DAS, before the mutant  
286 phenotype was visible, only 166 genes were differentially expressed, 57 of which differed more  
287 than two-fold (Fig. 7A, Table S7). At 12 and 14 DAS, still only a few hundred genes were  
288 differentially expressed (Fig. 7A, Table S7), with slightly more downregulated than upregulated  
289 in the mutant compared to wildtype.

290 We investigated the expression of *SPP1* and its four homologs, *SvAUX2*-*SvAUX5* (Fig.  
291 7B); *SvAUX1* is *SPP1*. *SvAUX1* expression in *spp1* was significantly reduced at 12 and 14 DAS  
292 compared to that in A10.1 (Fig. 7B), as shown previously with qRT-PCR (Huang et al., 2017).  
293 At all three time points of both genotypes, expression of *SvAUX2* was several-fold lower than  
294 that of *SvAUX1* and *SvAUX3* was scarcely expressed at all (FPKM values <1 for all samples;  
295 Table S6). *SvAUX4* and *SvAUX5* were more highly expressed than *SvAUX1* over all three time

296 points. Among *SvAUX2-SvAUX5*, only *SvAUX4* differed significantly in *spp1* mutants, with  
297 higher expression in mutant plants than in A10.1 (Fig. 7B), possibly indicating a compensation  
298 effect. *SvAUX1*, 2, 4, and 5 belong to the turquoise module in A10.1, members of which are  
299 down-regulated at 10 DAS but up-regulated by 14 DAS. In *spp1* mutants, the expression pattern  
300 reverses for *SvAUX1* and *SvAUX2* (Fig. S11).

301 Only a few auxin-related genes differed significantly in expression between genotypes  
302 (Fig. 7C, Table S8). In A10.1 these fell into the turquoise, blue and brown modules (Fig. S11),  
303 which together include most of the transcripts. *SvVT2* and two auxin signaling F-box binding  
304 (AFB) genes (encoding potential auxin receptors), and a homolog of *BARREN STALK1/LAX*  
305 *PANICLE 1 (LAX1/SvBA1*, encoding a basic helix-loop-helix protein potentially involved in  
306 auxin signaling) (Komatsu et al., 2003; Gallavotti et al., 2004) were downregulated at 12 and/or  
307 14 DAS (Fig. 7C). While five of the six AUX/IAA genes were up-regulated in the mutant, one  
308 (4G058700\_AUX/IAA) was down-regulated (Fig. 7C, Table S8).

309 Genes whose homologs in maize are important for branch initiation and boundary  
310 formation were all downregulated in *spp1* (Fig. 7D, Table S7), including homologs of *TASSEL*  
311 *SHEATH1 (TSH1*, encoding a GATA transcription factor (TF)) (Wang et al., 2009; Whipple et  
312 al., 2010), *BRANCH ANGLE DEFECTIVE1 (BADI*, a TCP TF) (Bai et al., 2012), *BARREN*  
313 *STALK FASTIGIATE1 (BAF1*, an AT-hook protein) (Gallavotti et al., 2011) and *LIGULELESS 1*  
314 (*LGI*, a nuclear localized protein) (Moreno et al., 1997; Lewis et al., 2014). Expression of  
315 homologs of the RAMOSA pathway genes *RA1* (encoding a Cys2-His2 zinc-finger TF)  
316 (Vollbrecht et al., 2005), *RA2* (a *LATERAL ORGAN BOUNDARY (LOB)* domain TF) (Moreno et  
317 al., 1997; Bortiri et al., 2006) and *RA3* (encoding a trehalose-phosphate phosphatase) (Satoh-  
318 Nagasawa et al., 2006), also was lower in *spp1* (Fig. 7D, Table S7). Because expression levels  
319 are standardized to reflect relative, rather than absolute, expression, the down-regulation is  
320 unlikely to reflect the lower number of branches in *spp1*.

321 In contrast, homologs of genes promoting meristem indeterminacy and inflorescence  
322 meristem identity were upregulated (Fig. 7D, Table S7), including *TAWAWAI (TAWI)* (Yoshida  
323 et al., 2013) and *TERMINAL FLOWER1 (TFL1)* (Nakagawa et al., 2002; Danilevskaya et al.,  
324 2010; Hanano and Goto, 2011). A homolog of *ABERRANT PHYLLOTAXY 1 (ABPH1*, a  
325 cytokinin-inducible type A response regulator), which controls phyllotactic patterning and  
326 meristem size (Lee et al., 2009), was also significantly upregulated in *spp1*(Fig. 7D, Table S7),

327 as were homologs of *BROWN MIDRIB 1* and 3 (*SvBM1* and *SvBM3*)(Fig. 7D and Table S7).  
328 While BM1 and BM3 are involved in lignin synthesis in maize (Vignols et al., 1995; Halpin et  
329 al., 1998), they also affect kernel number, plant height, and days to flowering (Pedersen et al.,  
330 2005), traits associated with *spp1/aux1* mutations.

331

### 332 **SPP1/SvAUX1, but not the other four AUX1 homologs, is necessary for inflorescence** 333 **branching**

334 We used CRISPR-Cas9 technology with two guide RNAs to introduce mutations into all  
335 five putative auxin importers in accession ME034V, used for its high transformation efficiency  
336 (Zhu et al., 2017) (Fig. S12A). We obtained two independently edited *svaux1* single mutants,  
337 which exhibited a phenotype similar to that of the *spp1* mutant in the A10.1 background (Fig.  
338 S12B). We also retrieved two double mutants, *svaux1svaux5* (designated as *aux1,5* for short) and  
339 *svaux1svaux3* (*aux1,3*), one triple mutant, *svaux1svaux2svaux5* (*aux1,2,5*) and two quintuple  
340 mutants, *svaux1svaux2svaux3svaux4svaux5* (*aux1,2,3,4,5*) (Fig. S12B). One quintuple mutant,  
341 line cz66-11-16-11-1-4, had edits in all five homologs, with indels in *SvAUX2-SvAUX5* likely to  
342 knock out gene function because of frameshifts. However the edit in *SvAUX1* resulted in a single  
343 non-synonymous substitution (Fig. S12B), substituting an aliphatic residue (leucine) for an  
344 aromatic one (phenylalanine) in a presumed transmembrane domain (Fig. S6A); both residues  
345 are hydrophobic and will have limited effect on charge. We inferred that *SvAUX1* in this line  
346 could still be functional, leaving the line with only four mutated *SvAUX1* homologs. Here we  
347 refer to this line as *svaux2svaux3svaux4svaux5* (*aux2,3,4,5*).

348 All *SvAUX* mutants were significantly shorter than wildtype after 4 weeks of growth, and  
349 all except *aux1,5* were still shorter than wildtype at 10 weeks, although leaf number was not  
350 significantly affected (Fig. 8A-8F, 8M; Table S9). Tiller number in wildtype plants did not differ  
351 between 4 and 10 weeks of growth, and the mutants did not differ amongst themselves at either  
352 stage (Fig. 8A-8F, 8N; Table S9). However, tiller number in the mutants was significantly  
353 higher than wildtype at 10 weeks despite having been the same at 4 weeks. Because *aux2,3,4,5*  
354 had more tillers, one of its the four mutant AUX loci likely contributes to the tillering phenotype  
355 in addition to *SvAUX1* (Fig. 8A-8F, 8N).

356 Inflorescences of higher order mutants involving *svaux1* were similar to those of *svaux1*  
357 single mutants (Fig. 8G-8L), consistent with our hypothesis that *SvAUX1* is the major auxin

358 influx carrier regulating inflorescence branching. Conversely, inflorescences of *aux2,3,4,5* were  
359 morphologically similar to those of wildtype (Fig. 8G, 8K), implying that the F377L substitution  
360 in SvAUX1 in that line indeed does not affect its function and that SvAUX1 alone is sufficient  
361 for inflorescence branch formation. Panicle length did not vary significantly among the plants,  
362 except that the panicle of *aux2,3,4,5* was slightly shorter, a difference that was just barely  
363 significant (Table S9).

364         The higher order mutants also exhibited phenotypes that were not observed in wildtype or  
365 single mutants (*svaux1* or *spp1*). For example, *aux1,2,5* and *aux1,2,3,4,5* often produced twisted  
366 or tube-shaped leaves, or leaves that senesced prematurely with yellowing tips and edges (Fig.  
367 8O-8Q). Midrib cell layers and organization were affected in these mutants (Fig. 8R-8T). Lateral  
368 root number in the *aux1,5* and *aux1,2,5* was also reduced but primary root length was unaffected  
369 (Fig. S12C-S12E).

370

371

## 372 **DISCUSSION**

373 The effect of AUX1 mutations on the inflorescence in *S. viridis* (*spp1/SvAUX1*) is strong, easily  
374 observed, and not obscured by mutations in its four paralogs, unlike mutations in AUX1  
375 orthologs in other species such as Arabidopsis. The clear mutant phenotype has allowed us to  
376 uncover and validate numerous developmental roles for the auxin importer, including several  
377 that had not been observed in other systems. We were specifically interested in the role of  
378 SvAUX1 in inflorescence branching but also identified functions in stigma branching, formation  
379 of higher order inflorescence branches, and glumes (leaf-like floral bracts) which together affect  
380 plant fertility (yield). We extended our observations to maize, where, by manipulating other  
381 aspects of auxin synthesis, transport and signaling, we showed that ZmAUX1 also influences  
382 leaf number, which has not been observed previously. SvAUX1~GFP shows that the protein is  
383 membrane-localized and is expressed in inflorescence branch meristems, consistent with mutant  
384 analysis indicating that it is clearly necessary for inflorescence branching in *S. viridis*. Our data  
385 also add SPP1/AUX1 to the list of auxin transporters showing epidermal localization (Kubeš et  
386 al., 2012; Balzan et al., 2014; Swarup and Bhosale, 2019).

387         Of the five AUX1-like genes in *S. viridis*, SPP1/SvAUX1 has the major effect on  
388 inflorescence branching, although we cannot fully rule out the possibility that the other homologs  
389 could have a weak effect on their own. Consistent with this, AUX2 and AUX3 have low to no  
390 expression during inflorescence development. AUX4 and AUX5 are highly expressed during  
391 early inflorescence development, but mutations in these genes do not further enhance the sparse  
392 panicle phenotype of *spp1*; instead they lead to shorter plants. Assuming that the model of auxin  
393 flow in *S. viridis* is similar to that demonstrated in other species (e.g., O'Connor et al. (2014)),  
394 we speculate that AUX4 and AUX5 proteins could participate in internal basipetal auxin  
395 transport from auxin maxima at the branch initiation sites, whereas SPP1/AUX1 is likely  
396 mediating auxin movement to the branch initiation sites in the outer cell layers. Future imaging  
397 of the localization and dynamics of these auxin influx carriers is necessary to test this hypothesis.

398         Although SvAUX2-SvAUX5 make minimal or no contribution to inflorescence  
399 branching, they collectively are also important for plant height, tiller formation and leaf  
400 development. Reduced plant height and increased tiller number, as seen in higher order mutants,  
401 indicates a loss in apical dominance, a characteristic function of auxin. Twisted leaves are also



402 seen in maize mutants whose auxin function is compromised, such as *growth regulating factor-*  
403 *interacting factor1* (Zhang et al., 2018) and *rough sheath 2* (Tsiantis et al., 1999).

404

#### 405 **SPP1 regulates multiple aspects of inflorescence development downstream of meristem** 406 **maintenance**

407 The *spp1(svau1)* mutant has fewer primary inflorescence branches, fewer higher order  
408 inflorescence branches, an altered ratio of bristles to spikelets, and defective stigmas, indicating  
409 that SPP1 controls branch initiation and elongation and meristem fate determination. The *zmaux1*  
410 mutant was also abnormal in these aspects, suggesting the role of SPP1 is likely conserved in the  
411 panicoid grasses. However, inflorescence meristem size is not affected in *spp1*, suggesting that  
412 SPP1 controls inflorescence development independent of meristem maintenance in grasses. This  
413 is consistent with findings from Arabidopsis, where the quadruple mutant of *aux1lax1lax2lax3*  
414 had a normal meristem, despite its defects in phyllotactic patterning (Bainbridge et al., 2008).

415 The only defective floral organ in *spp1* is the stigma, whereas other auxin-related grass  
416 mutants, such as *bal* (Gallavotti et al., 2004) and *bif2* (McSteen and Hake, 2001), aborted  
417 multiple floral organs. Stigmas in most grasses are highly branched, and our data suggest that  
418 auxin transport is necessary for appropriate branch formation. Mutations in other genes such as  
419 those of a SHORT INTERNODES (SHI) family transcription factor (Yuo et al., 2012) also affect  
420 stigma morphology, suggesting that a specific network of genes regulating stigma formation  
421 remains to be discovered. The stigma defects could also contribute to reduced fertility in *spp1*,  
422 although auxin is also involved in fertilization and seed development (Robert et al., 2015;  
423 Figueiredo and Köhler, 2018), which remain to be investigated in *spp1*.

424

#### 425 **SPP1 affects regulation of many branching-related genes, but not wholesale rewiring of the** 426 **transcriptome**

427 Several positive regulators of branch initiation, such as SvLG1 and SvTSH, are  
428 downregulated in *spp1* mutants. RA1-RA3 control meristem fate and determinacy and their  
429 expression was also altered in *spp1*. However, TSH4 (encoding a Squamosa Promoter Binding  
430 Protein TF) (Chuck et al., 2010; Whipple et al., 2010) is part of the same pathway as TSH1 and  
431 controls boundary formation during lateral organ initiation, but expression of TSH4 is unchanged  
432 in *spp1*. Some genes involved in auxin signaling and response are affected, including several



433 (but not all) AUX/IAAs, ARFs and SvBA1, but they do not respond to the *spp1* mutation in a  
434 consistent manner, with some being upregulated and others downregulated.

435 Because *spp1* is a presumed transporter, effects on transcription must be indirect and are  
436 likely responding to levels of auxin. Even without active auxin import into the cell, it is still able  
437 to diffuse in but this is (presumably) a less tightly controlled process than transport. Thus the  
438 genes and processes that are downregulated are likely to be ones that require both rapid and  
439 precisely timed active transport.

440 We suggest that the *spp1/svaux1* mutants and the SPP1~GFP tagged line could provide  
441 useful tools with which to develop broader models of auxin flux into and out of cells. While  
442 most of the phenotypes we report are not unexpected for a protein that affects auxin, they show  
443 that auxin influx exerts a more central control over plant development than previously known. In  
444 particular, SPP1/SvAUX1 is clearly a central player in the genetic network that modulates all  
445 above-ground branching and could be used to test models of auxin regulation. Whether the  
446 effects we see in *Setaria* and maize indicate a fundamental difference between monocots and  
447 dicots in the role of auxin influx awaits testing in a broader set of species.

448

## 449 **MATERIALS AND METHODS**

### 450 **Plant growth, phenotyping, and statistical comparisons**

451 *Setaria viridis* accessions A10.1 and ME034V were grown in growth chamber and greenhouse  
452 conditions, respectively, following Acharya et al. (2017) and Zhu et al. (2018). The original *spp1*  
453 mutation was isolated from an A10.1 background; ME034V was chosen for CRISPR  
454 confirmation of the mutant phenotype because of its high transformation efficiency. Plant height,  
455 leaf number, panicle length, and branch number were measured as described in Huang et al.  
456 (2017) and Zhu et al. (2018). Fertility was measured as the ratio of spikelets with a fully  
457 developed upper floret to total spikelets; bristles were ignored for fertility measurements. Tillers  
458 were counted at 37 days after sowing (DAS) and plant height measured at 40 DAS. Histology  
459 and SEM followed Zhu et al. (2018). Inflorescence length, meristem width and height were  
460 measured using ImageJ (Schneider et al., 2012) from SEM photos.

461 For root phenotyping, sterilized seeds were grown either in Murashige and Skoog (MS)  
462 medium or germination pouches as described in Huang et al. (2017) and Acharya et al. (2017),  
463 respectively.

464 Auxin rescue experiments followed Marchant (1999) and Yu et al. (2015). 2, 4-D (from  
465 Plant Media, in 1mM stock with pure ethanol) and NAA (from Sigma-Aldrich, in 10mM stock  
466 with pure ethanol) were added to the medium to a final concentration of 0.1 mM. MS medium  
467 containing 0.1% ethanol was used as a mock control. Seeds were grown on MS medium for three  
468 days and then transferred to media containing appropriate concentrations of auxin or mock for  
469 three more days. Root hairs were imaged at 4x magnification on a Leica DM750 microscope.  
470 Root hair number was counted in the focal plane on the side of the root facing the observer and  
471 normalized to root length. Experiments were repeated three times.

472 In maize, *zmaux1* mutant plants were crossed to *vt2*, *bif2* and *Bif4* mutants, and F2  
473 segregating populations were grown in the field in Columbia, Missouri in 2017. Plants were  
474 genotyped to identify single and double mutants using primers listed in Table S10 and were  
475 phenotyped at the eighth week. For the dominant mutant *Bif4*, both heterozygotes and  
476 homozygotes were included for mutant phenotyping analysis. For each mutant and mutant  
477 combination we assessed traits of the tassel (length from flag leaf to tassel tip, number of  
478 branches, spikelets on main spike, spikelet number per cm) and ear (kernel number, ear row  
479 number), and three vegetative traits (height of flag leaf, number of leaves above the lowest  
480 elongated internode, and number of tillers).

481 All pairwise comparisons used Welch's t-test as implemented in R (R Core Team, 2020).  
482 Single, double and higher order mutants were compared to each other and to wildtype by one-  
483 way or two-way Type I or Type II ANOVA as appropriate, followed by Tukey's HSD test using  
484 standard programs in R (R Core Team, 2020). Comparisons with  $p > 0.05$  were considered non-  
485 significant.

486

### 487 **Generation of mutants for auxin importer gene homologs**

488 Cloning of CRISPR-Cas9 constructs and *S. viridis* transformation followed Zhu et al. (2018).  
489 Two guide RNAs targeting GGGAGATCATGCACGCGATG and  
490 AGTTGATGGCCCGAAGAAG, respectively, were designed to target all five *SvAUX1*  
491 paralogs and used in the CRISPR-Cas9 constructs, which were then transformed into the  
492 accession ME034V. More than ten transgenic plants were obtained and gene edits in the auxin  
493 importer genes were examined using primers listed in Table S10. Stable homozygous lines in T3  
494 or T4 were used for phenotypic analysis.

495

## 496 **RNAseq sampling, sequencing and analysis**

497 Inflorescences from both A10.1 control plants and *spp1* mutants (in the A10.1 background) were  
498 dissected at 10, 12, and 14 days after sowing (DAS) for RNA extraction and library preparation  
499 with three to four biological replicates per genotype and stage, following Zhu et al. (2018). 100  
500 bp paired-end sequences were produced on the Illumina HiSeq 2500 platform at the University  
501 of Illinois at Urbana-Champaign W.M. Keck Center.

502 Adaptors and low-quality reads were trimmed using Trimmomatic (Bolger et al., 2014)  
503 and reads were quality-checked using fastqc after trimming. The *S. viridis* reference genome (v1)  
504 was indexed using bowtie 2 (Langmead and Salzberg, 2012) from Sviridis\_311\_v1.0.fa.gz file at  
505 PhytozomeV11 (phytozome.jgi.doe.gov). Reads were mapped to the reference genome using  
506 tophat2 and differentially expressed genes were identified using cuffdiff (Trapnell et al., 2012).  
507 Expression levels quantified in Fragments Per Kilobase of transcript per Million (FPKM) were  
508 extracted for 35,214 *S. viridis* primary transcripts (Tables S5, S6). Gene annotation and grass  
509 homolog identification followed Zhu et al. ((2018)).

510 Genes with an average FPKM  $\geq 5$  per sample group (3-4 biological replicates) were  
511 extracted, and the  $\log_2(\text{FPKM}+1)$  of genes within the top 75% of the highest median absolute  
512 deviation (MAD) across three developmental stages was selected for co-expression analysis  
513 (nGenes = 10,434 from both genotypes). A co-expression network was constructed for each  
514 genotype using the R package WGCNA (v1.70) (Langfelder and Horvath, 2008) with an  
515 established pipeline (Yu et al., 2020), with blockwiseModules function and the following  
516 parameters: soft-thresholding power of 18, minModuleSize of 100, detectCutHeight of 0.995,  
517 mergeCutHeight of 0.25, deepSplit of 2. Degree distributions in each individual network  
518 followed the power law and satisfied the scale-free topology. Conservation of modules was  
519 tested with the modulePreservation function in the WGCNA package (Langfelder et al., 2011)  
520 following Yu et al. (2020). An improved *S. viridis* gene ortholog (GO) annotation was generated  
521 by the GOMAP annotation pipeline (Wimalanathan and Lawrence-Dill, 2021). 33391 of 35214  
522 genes (representing 94.8% of primary transcripts in the *S. viridis* genome v1.1) were successfully  
523 annotated, with the median number of annotation terms per gene of 8. GO enrichment analysis  
524 and visualization used the R package clusterProfiler (v4.0) (Wu et al., 2021). The chord diagram  
525 of changes in module membership was plotted with R package circlize (v 0.4.13).

526

## 527 **Creation of SvSPP1~iGFP fusion protein, subcellular localization, and transgenics**

528 Binary vectors were built using standard Golden Gate assembly (Werner et al., 2012). *SPP1* was  
529 internally tagged (hereafter, *SPP1~iGFP*) and placed either under the native *SvSPP1*  
530 (*proSvSPP1::SPP1-iGFP*) or a constitutive *Panicum virgatum UBII* promoter  
531 (*proPvUBII::SPP1-iGFP*). We were unable to transform *S. viridis* with the C-terminal fusion of  
532 GFP (SvSPP1-GFP), a problem also encountered in Arabidopsis by Swarup et al. (2004) for C-  
533 and N-terminal reporter fusions of auxin influx carriers including AtAUX1. Hence, we chose an  
534 internal facing (cytoplasmic) N-terminal hydrophilic loop of SPP1 because a similar AtAUX1  
535 construct retained its topology and physiological role (Swarup et al., 2004). The GFP sequence  
536 in SvSPP1~iGFP was inserted between Lys<sub>121</sub> and Asn<sub>122</sub> (Fig. S6A), predicted to be in a  
537 hydrophilic loop (Swarup et al., 2004). 3kb of *SvSPP1* upstream sequence was PCR-amplified  
538 using genomic DNA and used as *proSvSPP1*. *SPP1a* (1-363), *SPP1b* (363-1470) and *GFP*  
539 fragments were PCR-amplified using either cDNA or the plasmid *pLOM-C2-eGFP-15095* as  
540 templates; primers are listed in Table S10. Each PCR fragment was cloned individually into the  
541 level 0 vectors *pICH41233* (*proSvSPP1*), *pICH41258* (*SPP1a*), *pAGM1299* (*GFP*), and  
542 *pAGM1301* (*SPP1b*). The resultant level 0 constructs plus level 0 NosT (*Nopaline synthase*  
543 terminator) vector were subsequently cloned in the level 1 vector *pICH47742* to produce  
544 *pICH47742-proSvSPP1::SvSPP1-iGFP::NosT*. The Level 1 construct *pICH47802-*  
545 *proZmUBII::HPT*, an expression cassette with a functional *HPT* (*hygromycin*  
546 *phosphotransferase*) gene under a constitutive *Zea mays UBIQUITIN 1* promoter  
547 (*proZmUBII::HPT*), and the *pICH47742-proSvSPP1::SvSPP1-iGFP::NosT* were then  
548 assembled in the binary level 2 vector *pICSL4723*.

549 The binary vector was transformed in *Agrobacterium tumefaciens* strain AGL1 for  
550 transient (tobacco) or transgenic (*S. viridis*) expression analysis. To check transient expression,  
551 six-week-old *Nicotiana benthamiana* leaves were agro-infiltrated as previously described (Cho et  
552 al., 2015). After 4 days, GFP fluorescence was visualized using a Leica SP8 (USA) confocal  
553 laser scanning microscope. Excitation and emission wavelengths for GFP and chlorophyll were  
554 488/ 510-540 nm and 561/ 673-726 nm, respectively.

555 The binary vector was stably transformed into the *spp1-1* mutant line (Huang et al., 2017)  
556 at the Donald Danforth Plant Science Center Plant Transformation Facility (St Louis, MO). Five

557 putatively transgenic plants were obtained and presence of GFP was confirmed in three of them  
558 using PCR genotyping with GFP-specific primers in the T<sub>0</sub> generation. One line homozygous for  
559 the transgene (GFP) was chosen and its stable expression was used in subsequent generations for  
560 confocal imaging (T<sub>3</sub>) and phenotypic analysis (T<sub>4</sub>). Primers for genotyping and expression  
561 assays are listed in Table S10.

562 Transgene expression was validated by RT-qPCR. 4DAS leaves (3<sup>rd</sup> leaf base) and  
563 11DAS primary inflorescences were hand-dissected as described in Li et al. (2010) and Huang et  
564 al. (2017), respectively. Four or five plants were pooled for each biological replicate. Total RNA  
565 was extracted using an RNeasy Plant Mini Kit (Qiagen) and quantified using a NanoDrop 1000  
566 spectrophotometer (Thermo-Fisher). Each RNA sample was reverse-transcribed to cDNA after  
567 DNase I treatment using a PrimeScript RT reagent kit (Takara). PCR was performed as described  
568 in Kumar et al. (2017). *Sevir.9G574400* and *Sevir.2G354200* were used as reference genes as  
569 described in Huang et al., (2017). The normalized relative quantity of GFP transgene to the two  
570 reference genes was estimated using the Comparative CT Method ( $\Delta\Delta^{CT}$  method) (Schmittgen  
571 and Livak, 2008).

572

### 573 **Image capture, analysis, and processing**

574 Confocal images were captured on a Leica TCS SP8 confocal laser scanning microscope with an  
575 HC PL APO CS2 63x, 40x and 20x /1.20 WATER objective lens (Leica Microsystems,  
576 Mannheim, Germany) and Leica Application Suite X (LAS X) software. The light source was  
577 the White Light Laser (WLL for GFP, chlorophyll, and FM4-64), while emission fluorescence  
578 was captured by the hybrid (HyD<sup>TM</sup>) detector. Excitation and emission wavelengths for GFP,  
579 FM4-64 and chlorophyll were 430/480 nm, 490/550 nm, and 561/673-726 nm, respectively. For  
580 bright field images, a conventional photomultiplier tube (PMT) for transmittance was used (PMT  
581 trans in LAS X software). For image capture, line averages and frame accumulations were 6-16  
582 (for roots) and 3-12 times (for inflorescence and leaves) to reduce noise. Inflorescence meristems  
583 and leaf cross sections were imaged as Z-stacks; images were reconstructed using Imaris x64,  
584 7.2.3 ([www.bitplane.com](http://www.bitplane.com)) with background subtraction settings enabled. SPP1 cellular  
585 localization in transgenic tissues was observed through multiple confocal sections. Four or five  
586 inflorescences from 11DAS plants were dissected under the stereomicroscope and analyzed. The  
587 fourth leaf from the base from 6DAS plants was embedded in 6% agarose, sectioned using a

588 Vibratome (1500 Sectioning System), and stained using FM4-64 as described by Grandjean et al.  
589 (2004) before imaging.

590 All images in this paper were resized as necessary, adjusted for brightness, and  
591 assembled into figures in Adobe Photoshop. Images were then imported into Adobe Illustrator  
592 for labeling. Graphs were produced with ggplot2 in R and also imported into Illustrator to adjust  
593 labels and line width.

594

## 595 **ACKNOWLEDGEMENTS**

596 We thank Daniel Voytas (University of Minnesota) for sending us pMOD\_A1110 (pJG471),  
597 pMOD\_B2518 (pJG310), pMOD\_C2616 (pJG338) and pTRANS\_250d (pRLG103) constructs  
598 for CRISPR-Cas9 cloning. Taylor AuBuchon-Elder, Michael Cambron and Callista Martin  
599 provided technical assistance early in the project. We thank Howard Berg and Kirk Czymmerk  
600 of the Advanced Bioimaging Laboratory at the Danforth Center for their technical help with  
601 confocal imaging and data analysis.

602

## 603 **DATA AVAILABILITY**

604 Raw sequence reads for RNA-seq in A10.1 through development are deposited at the NCBI  
605 Gene Expression Omnibus (GEO) under the accession number GSE118673 (Zhu et al. (2018)).  
606 Reads for the *sppI* mutant are in GEO under number XXX (to be inserted after manuscript  
607 acceptance). Raw phenotype data are in datadryad accession number XXX (to be inserted after  
608 manuscript acceptance).



609 **Figure legends**

610 **Figure 1. Phenotypes of *spp1* mutants.** (A) Mature plants of wildtype (A10.1, left) and *spp1*  
611 mutants (right) at 22 DAS. Scale = 2 cm. (B, C) Mature panicles. (B) wildtype, (C) *spp1*. Scale =  
612 1 cm. Brown or black spikelets contain fully developed seeds whereas whitish spikelets are often  
613 infertile. (D-M) Comparisons of trait values between wildtype (left bar, white) and *spp1* mutant  
614 (right bar, black) plants. Error bars,  $\pm$  one standard deviation. Significance values determined by  
615 Welch's t-test. = 0.01-0.05, \*, <0.01, \*\*, <0.001, \*\*\*, <0.0001. Values and sample sizes in Table  
616 S1. (D) Plant height (cm), (E) Tiller number), (F) Panicle length (cm), (G) Total number of  
617 spikelets, (H) Percent fertile spikelets, (I) Spikelet density (number of spikelets per cm), (J)  
618 Bristle density (number of bristles per cm), (K) Spikelets per primary branch, (L) Bristles per  
619 primary branch, (M) Bristles per spikelet (values from K divided by values from L), (N-O).  
620 Individual primary branches from wildtype (N) and *spp1* (O, P) mutants. Scale = 2 mm. sp,  
621 spikelet, br, bristle.

622  
623 **Figure 2. Floral phenotypes of *spp1*.** (A, B) SEM images of developing spikelets and bristles  
624 at 18 DAS. (A) wildtype (A10.1), (B) *spp1*. Arrows show un-detached meristems on bristle tips.  
625 Scale = 200  $\mu$ m. (C-F) Reproductive organs in wildtype (C) and *spp1* (D-F) mutant florets,  
626 showing abnormal development of stigmas and styles in the mutants. Scale = 250  $\mu$ m. (G) Bar  
627 graph showing percentage of florets with 0, 1 or 2 stigmas in wildtype (left) and *spp1* (right). (H,  
628 I) stigmas from wildtype (H) and *spp1* florets (I). Scale = 100  $\mu$ m. (J) stigma branch number  
629 counted from one side of the stigma on the focal plane in wildtype (left, white) and *spp1* (right,  
630 black) plants. Error bars,  $\pm$  one standard deviation. significance values as in Figure 1. Values  
631 and sample sizes in Table S1. an, anther; br, bristle; gl, glume; lo, lodicules; ov, ovary; sti,  
632 stigma; sty, style. Image (A) reproduced with permission from Zhu et al. (2018).

633  
634 **Figure 3. Early inflorescence development of *spp1*.** (A)-(N) SEM images of wildtype (A10.1)  
635 (A-E, K, L) and *spp1* (F-J, M, N) inflorescences at 10-16 DAS (left to right, one picture for each  
636 stage, respectively). Yellow arrow, fused primary branch meristems; blue arrow, failed initiation  
637 of primary branch meristem; white arrows, elongated branch primordia. (O-S) Comparisons of  
638 wildtype (white) and *spp1* (black) inflorescences as measured from SEM photos. (O) meristem  
639 height and (P) meristem width ( $\mu$ ) at 10-14 DAS. (Q) Inflorescence length (mm) at 10-14 DAS.



640 (R, S) Number of primary branch meristems per vertical row (R) and the total number visible  
641 from one side of the inflorescence (S). Error bars,  $\pm$  one standard deviation. Significance values  
642 determined by ANOVA; p values indicated as in Figure 1. Bars with the same letter are not  
643 significantly different. Values and sample sizes in Table S2. IM, inflorescence meristem.

644

645 **Figure 4. Early ear and tassel inflorescences of *zmaux1*.** (A)-(F) SEM images of wildtype  
646 (W22) (A-C) and *zmaux1* (D-F) inflorescences. (A, B) are heterozygous wt; *Zmaux1* (C) is  
647 homozygous wildtype. Ears (A, B, D, E) at 36 (A, D) and 43 DAS (B, E). Tassel at 26 DAS (C,  
648 F). Yellow arrows, single spikelets. White arrow, elongated spikelet. (G) Number of spikelets per  
649 vertical row in the ear in wildtype (white), heterozygote (gray) and *zmaux1* (black) plants. (H)  
650 Percentage single spikelets in ear. Colors as in (G). Error bars,  $\pm$  one standard deviation.  
651 Significance values determined by ANOVA; p values as in Figure 1. Bars with the same letter  
652 are not significantly different. Values and sample sizes in Table S3. Scale = 100  $\mu$ m. BM, branch  
653 meristem; IM, inflorescence meristem; SP, spikelet pair.

654

655 **Figure 5. Auxin double mutant analysis in maize.** (A) Model showing hypothesized  
656 relationship of classic genes involved in auxin biosynthesis, transport and signaling, based on  
657 information from the literature regarding function. (B, D, F) tassels and (C, E, G) ears from F2  
658 progeny of crosses between *zmaux1* and *vt2* (B, C), *bif2* (D, E), and *Bif4* (F, G). Genotypes in  
659 each panel are, left to right, wildtype (WT), *zmaux1*, classical mutant, and double mutant. Most  
660 *bif2* and *zmaux1bif2* mutants fail to produce ears. Scale = 5 cm.

661

662 **Figure 6. Expression pattern and subcellular localization of SPP1~iGFP in *S. viridis*.** (A-F)  
663 Localization of SPP1~iGFP in stably transformed *S. viridis* leaves at 8 DAS. (A) Leaf surface  
664 showing fluorescent signals on the plasma membrane (PM). Strongest signals on PM may  
665 indicate weak polar localization (white arrowhead). (B) Leaf cross section showing SPP1  
666 expression in epidermis and veins. (C) Leaf showing weak GFP signals on the transcellular  
667 strands (cyan arrowhead) extending from nucleus to PM, and around the nuclear membrane  
668 (yellow arrowhead). Red, chlorophyll autofluorescence. (D-F) Leaf cells expressing SPP1~iGFP  
669 (D; green), counterstained with FM4-64 (E; magenta), visible as a thin line on PM. Overlay (F)  
670 merges (D) and (E). (A, C-F) are single confocal sections; (B) is a projection of several sections.

671 Scales as noted on images. (G, H). Localization of SPP1~iGFP in stably transformed *Setaria*  
672 inflorescences at 11 DAS. (G) Expression of SPP1~iGFP fusion protein appears in initiation  
673 sites of primary branch meristems along inflorescence flanks (white arrowheads). IM lacks  
674 fluorescent signals. See also Supplemental Video 1. (H) A single epidermal confocal focal plane  
675 from Video S2 showing epidermal enrichment of SPP1~iGFP expression in meristems of  
676 elongating primary branches. A few secondary branches also express SPP1~iGFP (yellow  
677 arrowheads). Merged image of green (GFP signals) and magenta (for FM4-64 signals) channels.  
678 IM, inflorescence meristem; BM, branch meristem.

679

680 **Figure 7. Differentially expressed genes in *spp1* inflorescences at 10, 12 and 14 DAS.** (A)  
681 Numbers of genes that are differentially expressed, upregulated or downregulated between  
682 wildtype (A10.1) and *spp1* at each time point. (B) Expression of the five auxin influx carrier  
683 genes in *S. viridis* in wildtype and *spp1* inflorescences. (C) Heat map comparing expression of  
684 selected auxin-pathway related genes in wildtype (A10.1) and *spp1* inflorescences. (D) Heat map  
685 of selected differentially expressed genes involved in inflorescence branching. Yellow upward  
686 pointing arrows and black downward pointing arrows indicate upregulation and downregulation,  
687 respectively, compared to A10.1 at the same developmental stage.

688

689 **Figure 8. Auxin importer gene mutants in *S. viridis*.** (A-F) wildtype and mutant plants  
690 photographed at 58 DAS, showing relative height and extent of tillering. (A) wildtype  
691 (ME034V); (B) *aux1*; (C) *aux1,5*; (D) *aux1,2,5*; (E) *aux2,3,4,5*; (F) *aux1,2,3,4,5*. *aux 1,3* not  
692 available for this set of photos. Scale = 10 cm. (G-L) wildtype and mutant inflorescences from  
693 the same plants and on the same day as in (A-F). Scale = 2 cm. (M) Plant height (mm) at the 4th  
694 (light gray) and 10th (dark gray) week after sowing. Error bars are standard deviations; values  
695 with the same letter are not significantly different by ANOVA. See also Table S10 for means,  
696 standard deviations, and p values. (N) Number of tillers on each plant at the 4th (light gray) and  
697 10th (dark gray) week after sowing. Statistics as in (M). (O) wildtype ME034V (WT) leaf. Scale  
698 bar = 1 cm. (P, Q) Leaves in *aux1,2,5* or *aux1,2,3,4,5* mutants showing tube shape (P, right leaf  
699 in Q), early senescence in the tips (left leaf in Q), and twisted shape (right leaf in Q). Scale bar =  
700 1 cm. (R-T) Leaf cross sections from WT (R), *aux1,2,5* (S) and *aux1,2,3,4,5* (T) mutants.  
701 Toluidine blue staining. Scale bar = 100  $\mu$ m.

702

703 **Figure S1. Additional phenotypes of *spp1* mutant plants.** (A-G) Shoot phenotypes comparing  
704 wildtype (A10.1, white bars) with *spp1* mutants (black bars). (A) Days to heading. (B) Days to  
705 anthesis. (C) Size of upper (fertile) floret (mm). (D) Percent seed germination. (E) Peduncle  
706 diameter. (F, G) Cross sections of peduncles stained with toluidine blue. (F) wildtype (A10.1);  
707 (G) *spp1*. Arrows, vascular bundles; scale bar = 200  $\mu$ m. (H-N) Root phenotypes comparing  
708 wildtype (A10.1, white bars) with *spp1* mutants (black bars). (H, I) Density of root hairs on the  
709 main root (H) and lateral roots (I). (J, K). Number of root hair initials on the main root (J) and  
710 lateral roots (K). (L, M) Main and lateral roots of wildtype (L) and *spp1* (M) showing  
711 differences in root hair density. Scale = 2 mm. (N) Washed root systems of wildtype (left) and  
712 *spp1* (right) showing similar sizes. Scale = 1 cm. Error bars are standard deviations. Significance  
713 values determined by Welch's t-test. = 0.01-0.05, \*, <0.01, \*\*, <0.001, \*\*\*, <0.0001.

714

715 **Figure S2. Auxin rescue experiments.** (A-F) Root growth and gravitropism of A10.1 (A, C and  
716 E) and *spp1* (B, D and F) at mock (A and B), 0.1  $\mu$ m 2,4-D (C and D) and 0.1  $\mu$ m NAA (E and  
717 F) treatments. Scale bar = 3 cm. (G-L) Root hairs of A10.1 (G, I and K) and *spp1* (H, J and L) at  
718 mock (G and H), 0.1  $\mu$ m 2,4-D (I and J) and 0.1  $\mu$ m NAA (K and L) treatments. Scale bar = 1  
719 mm. (M) Root hair density on the primary roots in A10.1 and *spp1* with different auxin  
720 treatments. Significance assessed by ANOVA and Tukey's HSD. See Table S1 for means,  
721 standard deviations, and p values.

722

723 **Figure S3. Phenotype of *zmaux1vt2* double mutants.** (A) Representative whole plant pictures.  
724 (B) Ear row number. (C) Spikelets per row. (D) Total number of kernels. (E) Number of tassel  
725 branches. (F) Number of spikelets on the main spike of the tassel. (G) Number of spikelets per  
726 cm (spikelet density). (H) Tassel length (cm). (I) Flag leaf height (cm) from ground. (J) Total  
727 number of leaves. Branch number, tassel spikelet number per cm and kernel number measured  
728 at 56 DAS. Left to right, WT (white bars), *zmaux1* (gray bars), *vt2* (gray bars), *zmaux1vt2* (black  
729 bars). Error bars are  $\pm$  one standard deviation. Values with the same letter are not significantly  
730 different at  $p \leq 0.05$ . Significance assessed by ANOVA and Tukey's HSD. See Table S3 for  
731 sample sizes, means, standard deviations, and p values.

732

733 **Figure S4. Phenotype of *zmaux1bif2* double mutants.** (A) Representative whole plant pictures.  
734 (B) Ear row number. (C) Spikelets per row. (D) Total number of kernels. (E) Number of tassel  
735 branches. (F) Number of spikelets on the main spike of the tassel. (G) Number of spikelets per  
736 cm (spikelet density). (H) Tassel length (cm). (I) Flag leaf height (cm) from ground. (J) Total  
737 number of leaves. Branch number, tassel spikelet number per cm and kernel number measured  
738 at 56 DAS. Left to right, WT (white bars), *zmaux1* (gray bars), *bif2* (gray bars), *zmaux1bif2*  
739 (black bars). Statistics as in Figure S3.

740

741 **Figure S5. Phenotype of *zmaux1Bif4* double mutants.** (A) Representative whole plant  
742 pictures. (B) Ear row number. (C) Spikelets per row. (D) Total number of kernels. (E) Number  
743 of tassel branches. (F) Number of spikelets on the main spike of the tassel. (G) Number of  
744 spikelets per cm (spikelet density). (H) Tassel length (cm). (I) Flag leaf height (cm) from  
745 ground. (J) Total number of leaves. Branch number, tassel spikelet number per cm and kernel  
746 number measured at 56 DAS. Left to right, WT (white bars), *zmaux1* (gray bars), *Bif4* (gray  
747 bars), *zmaux1Bif4* (black bars). Statistics as in Figure S3.

748

749 **Figure S6. Cellular localization of SPP1~iGFP.** (A) Schematic diagram of SPP1 protein  
750 topology showing hydrophilic regions predicted to be in extra- and intracellular spaces. Green  
751 arrow indicates the position of GFP inserted in the N-terminal cytoplasmic loop (internal) to test  
752 SPP1~iGFP localization. Closed blue circle indicates the position of Phe<sub>377</sub> to Leu<sub>377</sub> substitution  
753 in the *svaux1* gene of *aux1,2,3,4,5*. (B-D) Confocal images of tobacco leaf cells transiently  
754 expressing SPP1~iGFP, showing localization to a thin line around the cell. Panels from left to  
755 right: SPP1~iGFP (B), chlorophyll autofluorescence (C), and overlay (D). Scale = 20  $\mu$ m. (E-J)  
756 Stable expression of SPP1~iGFP in roots of *S. viridis* at 9 DAS. Imaging of root tissues focused  
757 on either inner (E, F) or outer tissues (G-J) showing fluorescent signals on the plasma membrane  
758 (PM), predominantly in the epidermis. (I) Enlarged image of the boxed region of (H), confirming  
759 GFP signals around the nuclear membrane (yellow arrowheads). (J) Non-transgenic control.

760

761 **Figure S7. Validation of SPP1~iGFP in transgenic *S. viridis*.** (A) Gel image of PCR results  
762 confirming the presence of GFP band (~188bp, bottom bands) in transgenic *S. viridis* plants.  
763 PCR bands at ~540bp correspond to an *S. viridis* gene (*Sevir.2G209800*) serving as a positive

764 control. (B) RT-qPCR assay determining the expression of SPP1~iGFP in transgenics. Relative  
765 expression was quantified for *GFP* in leaf at 4 DAS (3<sup>rd</sup> leaf base; N = 4, pooled) and dissected  
766 inflorescence primordia at 11 DAS (N = 5, pooled), respectively. Data are the mean of three  
767 technical replicates. Expression data for *GFP* were normalized to expression of reference genes  
768 *Sevir.2G354200* and *Sevir.9G574400*. (C-K) Expression of SPP1~iGFP partially rescued the  
769 *spp1* defects in inflorescence and roots. (C) Representative plants from A10.1, non-transgenic  
770 (*spp1\_NT*) and transgenic (*spp1\_T*) lines at 26 DAS. (D) Plant heights at 23, 34, and 40 DAS for  
771 the three genotypes. (E) Representative panicles from A10.1, non-transgenic (*spp1\_NT*) and  
772 transgenic (*spp1\_T*) plants at 30 DAS. (F-I) Inflorescence traits for all three genotypes at 35  
773 DAS. (F) Panicle length. (G) Primary branch number. (H) Spikelet number per branch. (I) Bristle  
774 number per branch. (J) Root growth assay showing agravitropic response of *spp1\_T* seedlings at  
775 5 DAS. (K) Numbers of agravitropic seedlings in wt and transgenics. Bars represent mean  
776 values, error bars show standard deviations; data summarized in Table S4. Statistics as in Figure  
777 S3.

778

779 **Figure S8. Gene co-expression modules.** Weighted gene correlation network analysis  
780 (WGCNA) detected seven co-expression modules in wild *S. viridis* A10.1. (A) Cluster  
781 dendrogram shows co-expression module assignment. (B) Expression patterns of module genes  
782 and module eigengene are shown by heatmap (top) and bar graph (bottom), respectively.

783

784 **Figure S9. Comparisons between wild *S. viridis* A10.1 and *spp1* mutant networks.** (A)  
785 Preservation analysis of WGCNA modules in the reference genotype (wildtype *S. viridis* A10.1)  
786 versus the test genotype (*spp1* mutant) and conversely. (B).  $Z_{summary} > 10$ , high preservation,  
787  $2 < Z_{summary} < 10$ , weak to moderate preservation,  $Z_{summary} < 2$ , no preservation. (C) Similarity  
788 analysis using numbers of overlapping genes in WGCNA modules between genotypes, showing  
789 the number of overlapping genes and p-values from Fisher's exact test (in parentheses). White to  
790 red color gradient indicates  $-\log_{10}(p\text{-value})$ .

791

792 **Figure S10. GO enrichment.** GO enrichment analysis of major WGCNA modules in *S. viridis*  
793 A10.1, and *spp1* mutant. Dot color represents statistical significance of the enrichment (adjusted  
794 p-value, a color gradient from blue ( $< 0.01$ ) to red ( $< 0.05$ )). The sizes of the dots represent gene

795 ratio (number of significant genes/number of annotated genes in each GO term). GO terms were  
796 not significantly enriched in red and grey modules in A10.1, and grey module in *spp1* (not  
797 displayed).

798

799 **Figure S11. Chord diagram illustrating how WGCNA module membership differs between**  
800 **genotypes.** Color keys on the left side of the diagram represent the seven modules identified by  
801 WGCNA in wild *S. viridis* A10.1, and on the right side represent the ten modules in *spp1*. Paths  
802 of reassignment of genes are illustrated as flows in the diagram. The inner color keys ring of wild  
803 *S. viridis* A10.1 (left half) represents the reassigned modules in the *spp1* mutant. The three  
804 dashed lines show changes of module membership of five auxin-related genes.

805

806 **Figure S12. Mutants of auxin importer genes.** (A) Target sequences for gRNA1 (cyan arrow)  
807 and gRNA2 (magenta arrow), respectively. Boldface letters represent the PAM sites. On the gene  
808 models for the five auxin importer genes in *S. viridis*, SvAUX1-SvAUX5, cyan and magenta  
809 arrows show locations of target sites. Numbers at ends of arrows indicate number of mismatches  
810 between gRNA and target sites. (B) Table of edits at each gRNA target site in each of the five  
811 auxin influx carrier genes in each line. x, no editing; +, addition; -, deletion; bp, base pair; ->,  
812 substitution. (C) Roots of ME034V, *aux1,5* and *aux1,2,5* in 7 DAS plants. (D) Lateral root  
813 number and (E) primary root length in these plants.

814

815 **Video S1.** Confocal 3D reconstruction of a single inflorescence meristem corresponding to that  
816 shown in Figure 6G for *Setaria* SPP1~GFP expression domains.

817 **Video S2.** Confocal 3D reconstruction of early development of a single inflorescence  
818 corresponding to that shown in Figure 6H for *Setaria* SPP1~GFP expression domains. Image  
819 shows primary and some secondary branch meristems.

820

821 **List of supplemental tables with brief titles.**

822 **Table S1. Phenotypic comparisons between A10.1 and *spp1* mutants.**

823 **Table S2. Phenotypic comparisons between A10.1 and *spp1* mutants over development.**

824 **Table S3. Phenotypic comparisons between W22 (maize wildtype), *zmaux1* and single and**  
825 **double mutants of selected genes in the auxin pathway.**

- 826 **Table S4. Phenotypic comparisons between A10.1, spp1\_T and spp1\_NT, testing for**  
827 **complementation of SPP1~GFP.**
- 828 **Table S5. RNA-seq library sequencing and mapping statistics.**
- 829 **Table S6. Expression of all *S. viridis* genes from each replicate (R1-R4) of the**  
830 **developmental stages (10, 12, 14 DAS) in A10.1 and *spp1*.**
- 831 **Table S7. Expression of differentially expressed genes between A10.1 and *spp1* at each**  
832 **developmental stage (10, 12, 14 DAS).**
- 833 **Table S8. Expression of auxin pathway related genes in A10.1 and *spp1* at each**  
834 **developmental stage (10, 12, 14 DAS).**
- 835 **Table S9. Phenotypic comparisons among AUX CRISPR mutants.**
- 836 **Table S10: Primers used in this study.**



# Figure 1

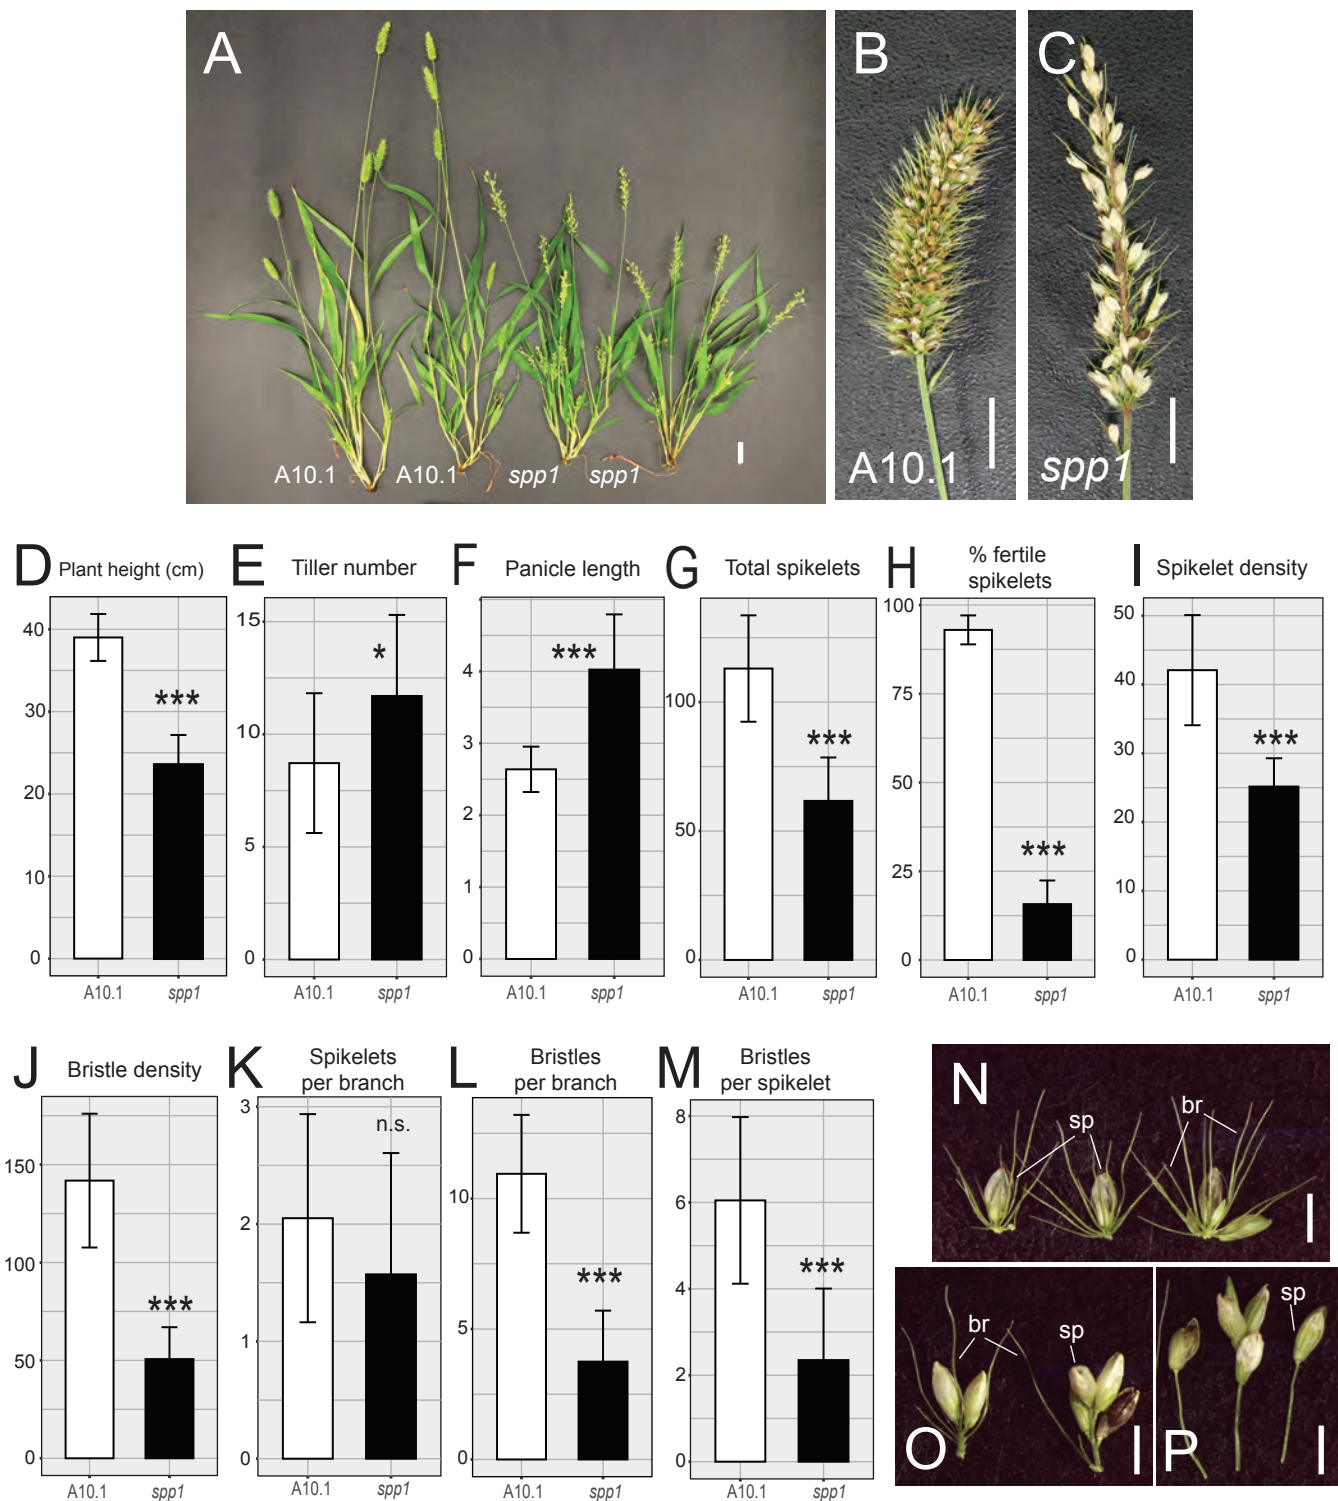

Figure 1. Phenotypes of *spp1* mutants. (A) Mature plants of wild type (A10.1, left) and *spp1* mutants (right) at 22 DAS. Scale = 2 cm. (B,C) Mature panicles. (B) wild type, (C) *spp1*. Scale = 1 cm. Brown or black spikelets contain fully developed seeds whereas whitish spikelets are often infertile. (D-M) Comparisons of trait values between wild type (left bar, white) and *spp1* mutant (right bar, black) plants. Error bars,  $\pm$  one standard deviation. Significance values determined by Welch's t-test. \*, <0.01, \*\*, <0.001, \*\*\*, <0.0001. Values and sample sizes in Table S1. (D) Plant height (cm), (E) Tiller number, (F) Panicle length (cm), (G) Total number of spikelets, (H) Percent fertile spikelets, (I) Spikelet density (number of spikelets per cm), (J) Bristle density (number of bristles per cm), (K) Spikelets per primary branch, (L) Bristles per primary branch, (M) Bristles per spikelet (values from K divided by values from L), (N-O). Individual primary branches from wild type (N) and *spp1* mutants (O, P). Scale = 2 mm. Sp, spikelet, br, bristle.

## Figure 2

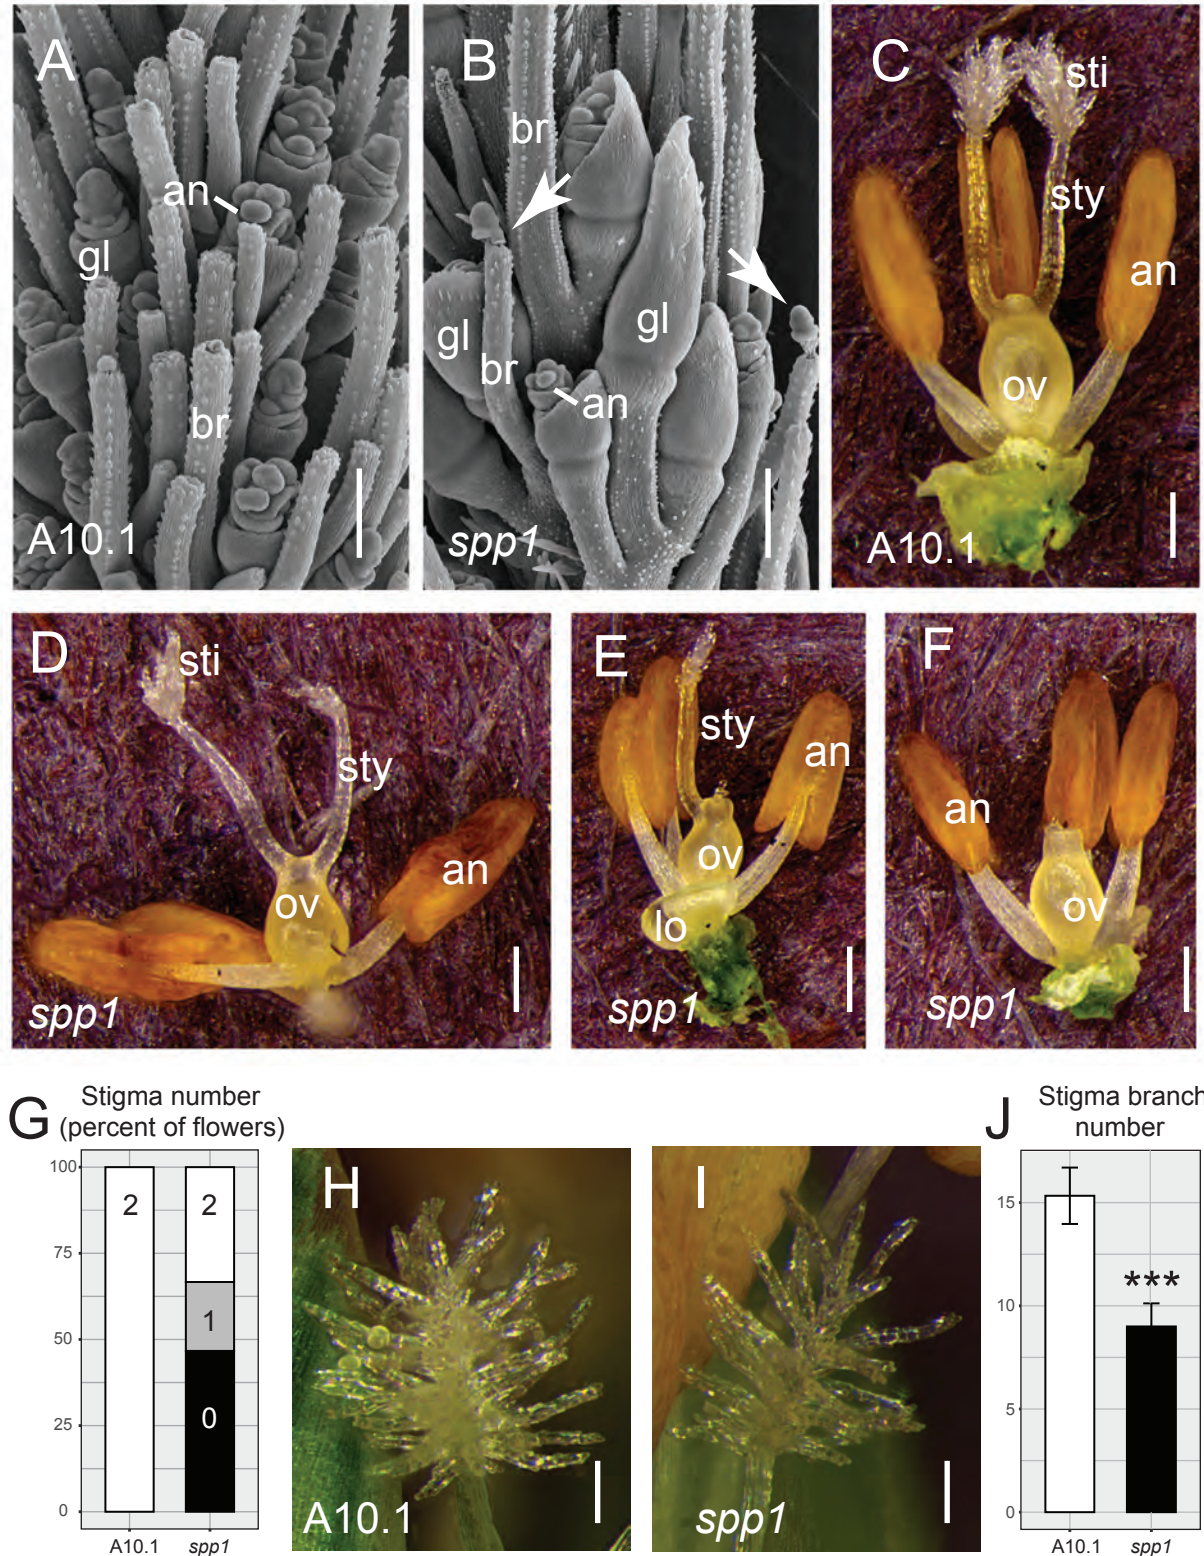

Figure 2. Floral phenotypes of *spp1*. (A, B) SEM images of developing spikelets and bristles at 18 DAS. (A) wild type (A10.1), (B) *spp1*. Arrows show un-detached meristems on bristle tips. Scale = 200  $\mu$ m. (C-F) Reproductive organs in wild type (C) and *spp1* (D-F) mutant florets, showing abnormal development of stigmas and styles in the mutants. Scale = 250  $\mu$ m. (G) Bar graph showing percentage of florets with 0, 1 or 2 stigmas in wild type (left) and *spp1* (right). (H, I) stigmas from wild type (H) and *spp1* florets (I). Scale = 100  $\mu$ m. (J) stigma branch number counted from one side of the stigma on the focal plane in wild type (left, white) and *spp1* (right, black) plants. Error bars,  $\pm$  one standard deviation. significance values as in Figure 1. Values and sample sizes in Table S1. an, anther; br, bristle; gl, glume; lo, lodicules; ov, ovary; sti, stigma; sty, style.



# Figure 3

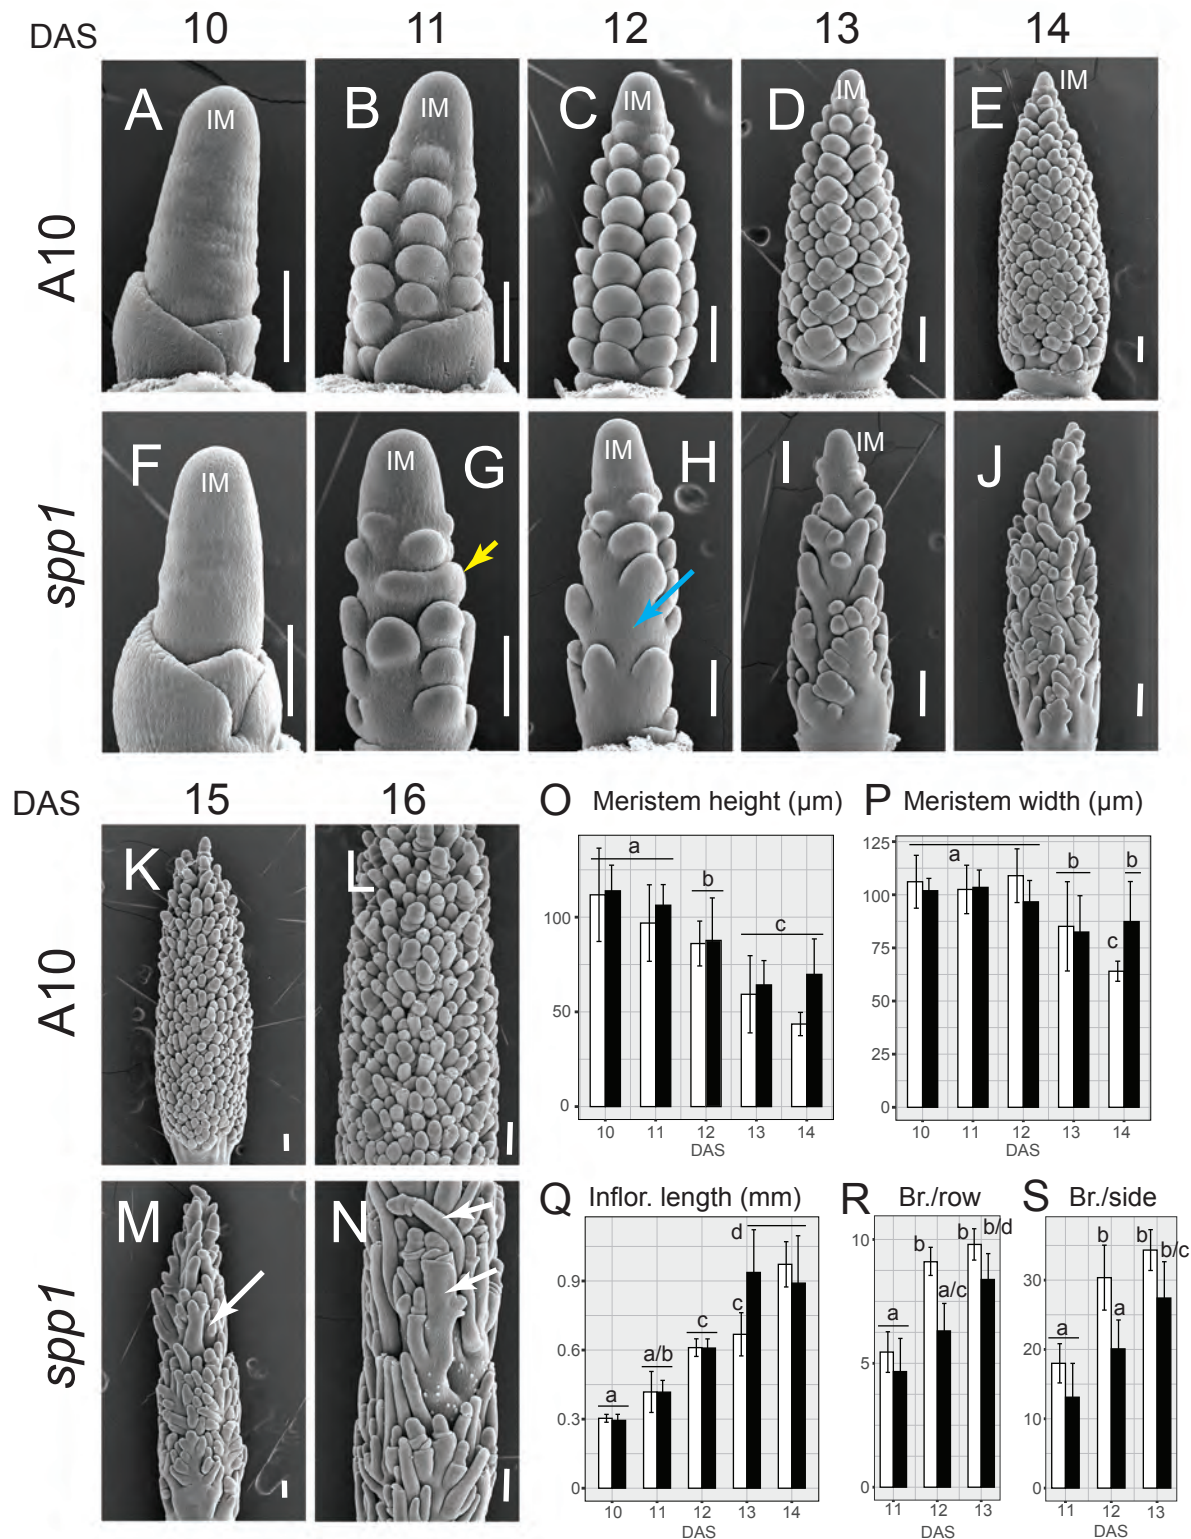

Figure 3. Early inflorescence development of *spp1*. (A)-(N) SEM images of wild type (A10.1) (A-E, K, L) and *spp1* (F-J, M, N) inflorescences at 10-16 DAS (left to right, one picture for each stage, respectively). Yellow arrow, fused primary branch meristems; blue arrow, failed initiation of primary branch meristem; white arrows, elongated branch primordia. (O-S) Comparisons of wild type (white) and *spp1* (black) inflorescences as measured from SEM photos. (O) meristem height and (P) meristem width ( $\mu$ ) at 10-14 DAS. (Q) Inflorescence length (mm) at 10-14 DAS. (R, S) Number of primary branch meristems per vertical row (R) and the total number visible from one side of the inflorescence (S). Error bars,  $\pm$  one standard deviation. Significance values determined by ANOVA; p values indicated as in Figure 1. Bars with the same letter are not significantly different. Values and sample sizes in Table S2. IM, inflorescence meristem.

## Figure 4

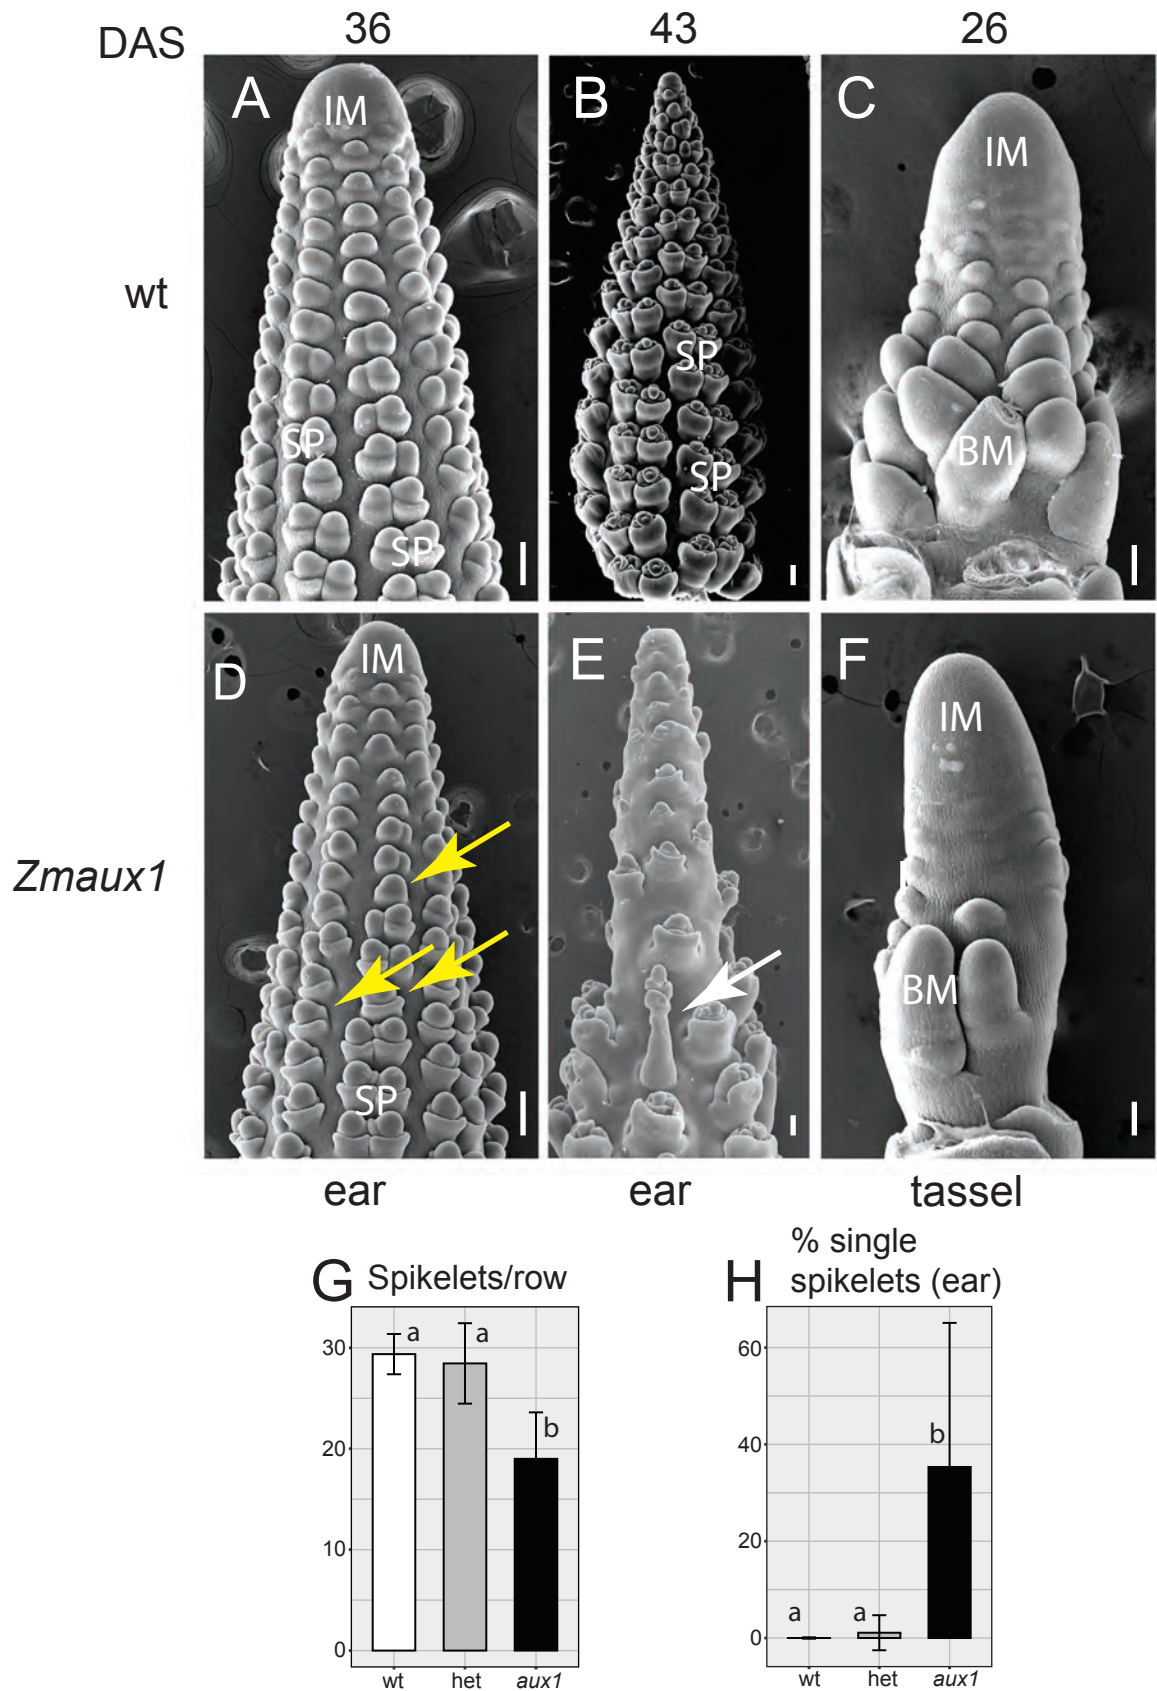

Figure 4. Early ear and tassel inflorescences of *zmaux1*. (A)-(F) SEM images of wild type (W22) (A-C) and *zmaux1* (D-F) inflorescences. (A, B) are heterozygous wt; *Zmaux1* (C) is homozygous wild type. Ears (A, B, D, E) at 36 (A, D) and 43 DAS (B, E). Tassel at 26 DAS (C, F). Yellow arrows, single spikelets. White arrow, elongated spikelet. (G) Number of spikelets per vertical row in the ear in wild type (white), heterozygote (gray) and *zmaux1* (black) plants. (H) Percentage single spikelets in ear in wild type (white), heterozygote (gray) and *zmaux1* (black) plants. Error bars,  $\pm$  one standard deviation. Significance values determined by ANOVA; p values as in Figure 1. Bars with the same letter are not significantly different. Values and sample sizes in Table S3. Scale = 100  $\mu$ m. BM, branch meristem; IM, inflorescence meristem; SP, spikelet pair.



## Figure 5

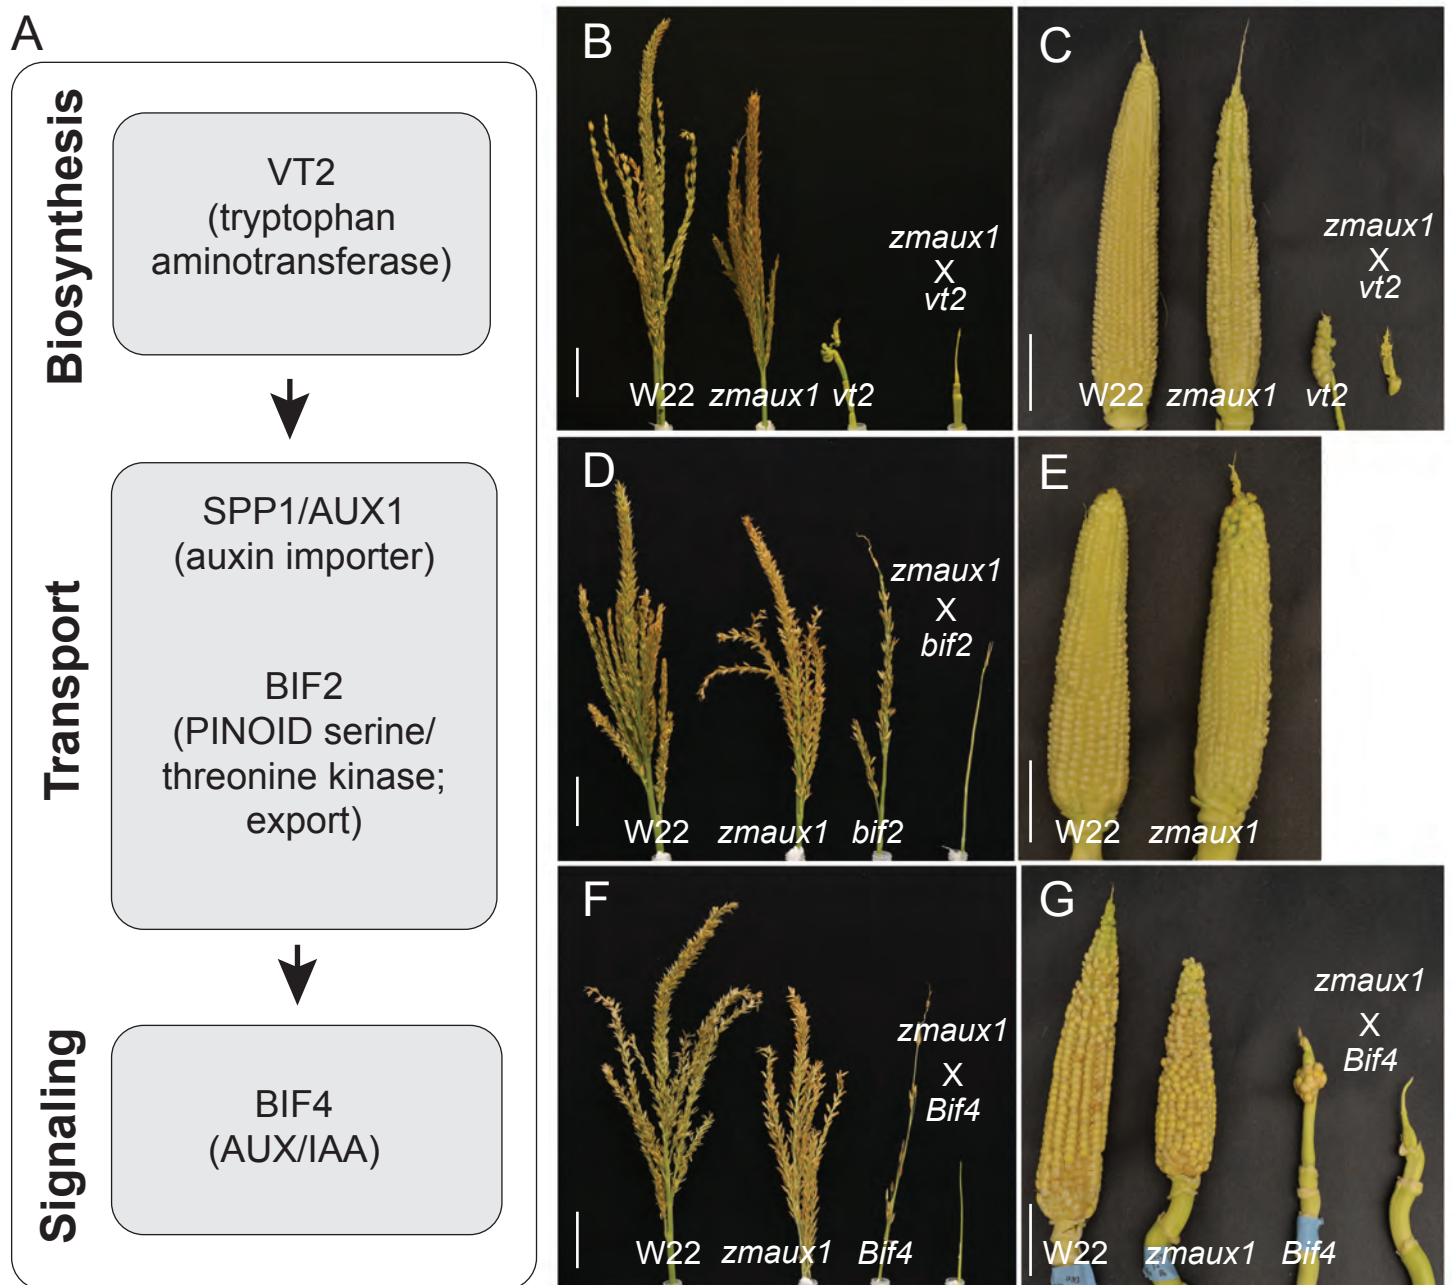

Figure 5. Auxin double mutant analysis in maize. (A) Model showing hypothesized relationship of classic genes involved in auxin biosynthesis, transport and signaling, based on information from the literature regarding function. (B, D, F) tassels and (C, E, G) ears from F<sub>2</sub> progeny of crosses between *zmaux1* and *vt2* (B, C), *bif2* (D, E), and *Bif4* (F, G). Genotypes in each panel are, left to right, wild type (WT), *zmaux1*, classical mutant, and double mutant. Most *bif2* and *zmaux1bif2* mutants fail to produce ears. Scale = 5 cm.

## Figure 6

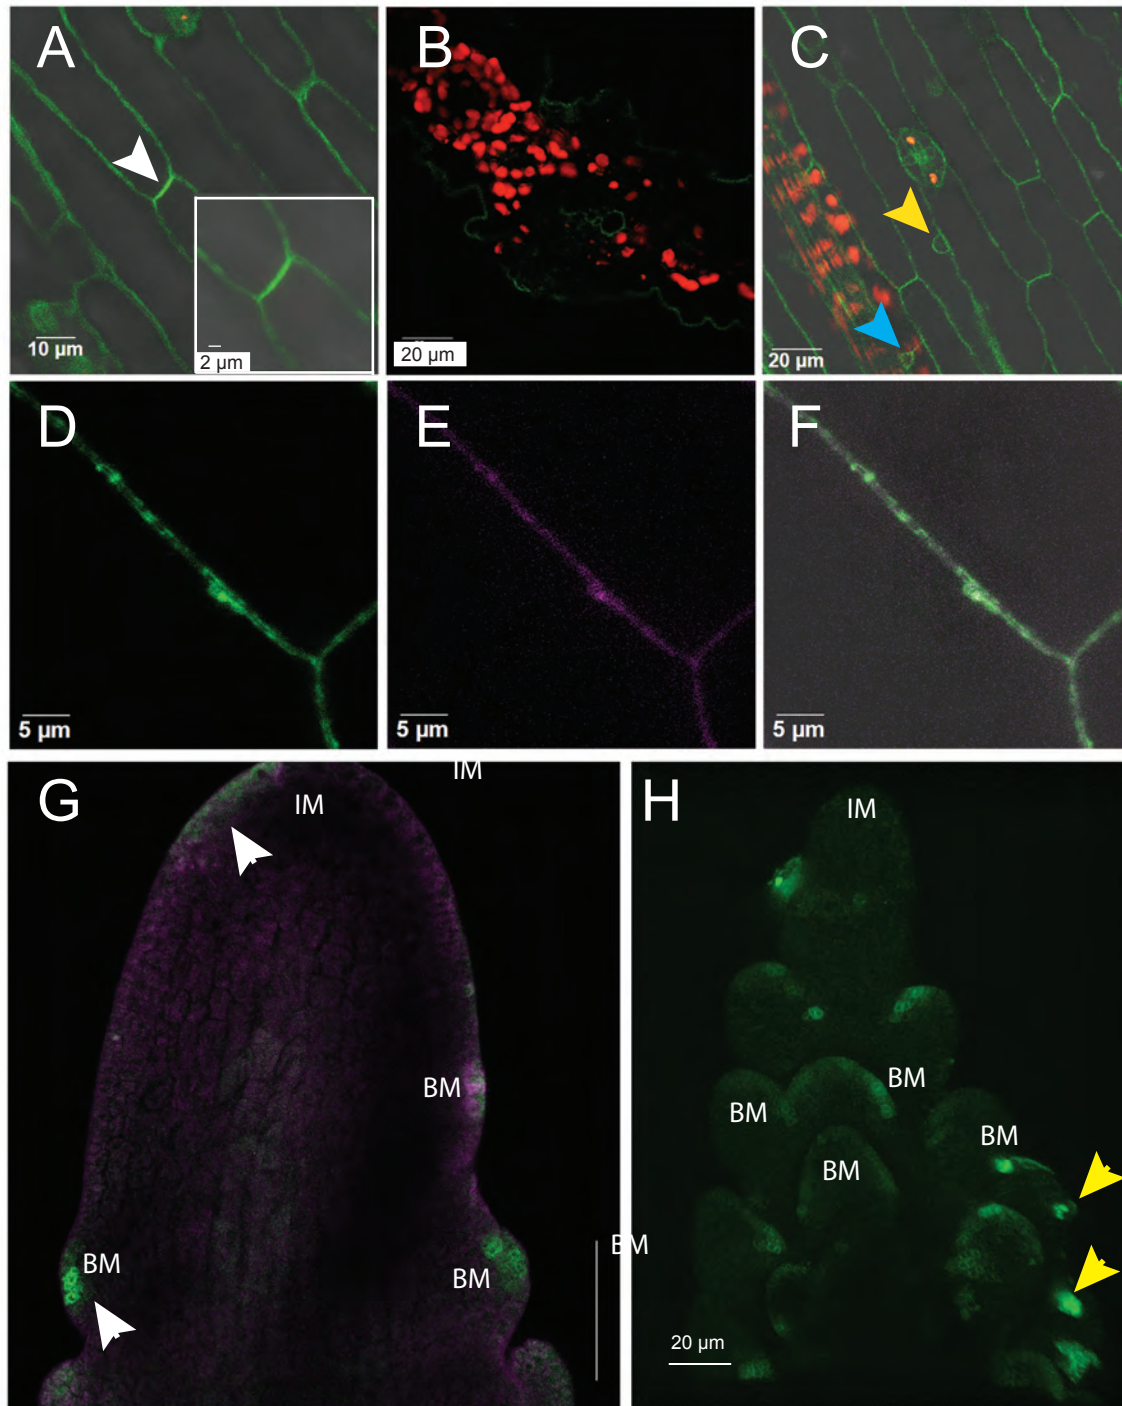

Figure 6. Expression pattern and subcellular localization of SPP1~iGFP in *S. viridis*. (A-F) Localization of SPP1~iGFP in stably transformed *S. viridis* leaves at 8 DAS. (A) Leaf surface showing fluorescent signals on the plasma membrane (PM). Strongest signals on PM may indicate weak polar localization (white arrowhead). (B) Leaf cross section showing SPP1 expression in epidermis and veins. (C) Leaf showing weak GFP signals on the transcellular strands (cyan arrowhead) extending from nucleus to PM, and around the nuclear membrane (yellow arrowhead). Red, chlorophyll autofluorescence. (D-F) Leaf cells expressing SPP1~iGFP (D; green), counterstained with FM4-64 (E; magenta), visible as a thin line on PM. Overlay (F) merges (D) and (E). (A, C-F) are single confocal sections; (B) is a projection of several sections. Scales as noted on images. (G, H). Localization of SPP1~iGFP in stably transformed inflorescences at 11 DAS. (G) Expression of SPP1~iGFP fusion protein appears in initiation sites of primary branch meristems along inflorescence flanks (white arrowheads). IM lacks fluorescent signals. See also Supplemental Video 1. (H) A single epidermal confocal focal plane from Supplementary Video 2 showing epidermal enrichment of SPP1~iGFP expression in meristems of elongating primary branches. A few secondary branches also express SPP1~iGFP (yellow arrowheads). Merged image of green (GFP signals) and magenta (for FM4-64 signals) channels. IM, inflorescence meristem; BM, branch meristem.



# Figure 7

A

| A10 vs. <i>spp1</i>       | P < 0.05 | P < 0.05<br>Fold > 2 | P < 0.05<br>Fold > 2<br>Up-regulated | P < 0.05<br>Fold > 2<br>Down-regulated |
|---------------------------|----------|----------------------|--------------------------------------|----------------------------------------|
| A10 vs. <i>spp1</i> 10DAS | 166      | 57                   | 26                                   | 31                                     |
| A10 vs. <i>spp1</i> 12DAS | 810      | 219                  | 94                                   | 125                                    |
| A10 vs. <i>spp1</i> 14DAS | 2573     | 312                  | 111                                  | 201                                    |

B

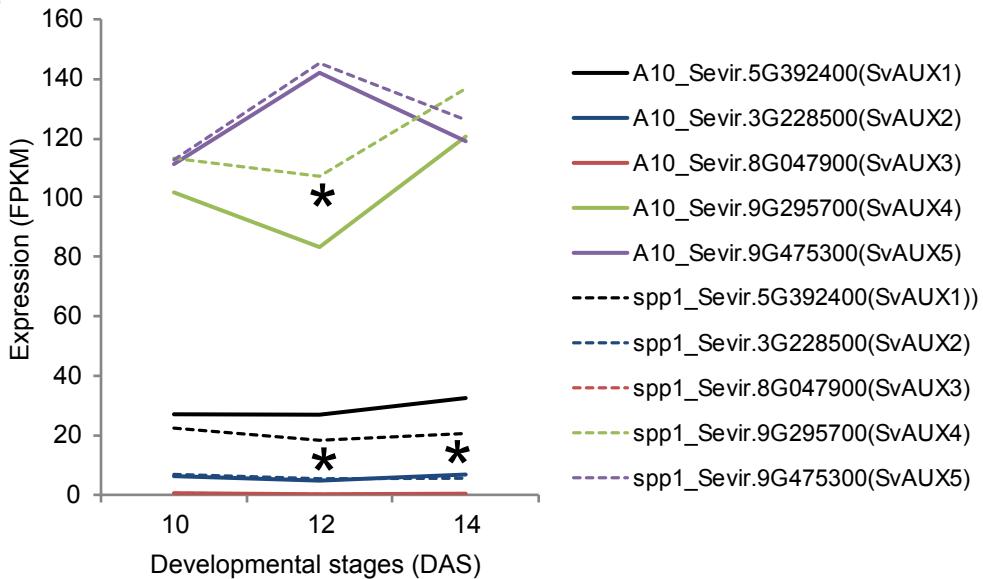

C

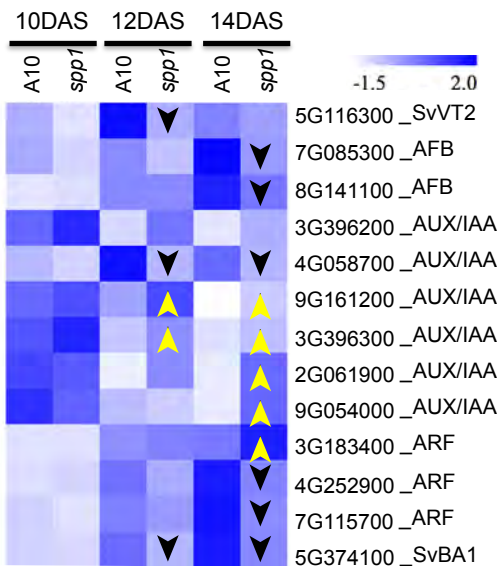

D

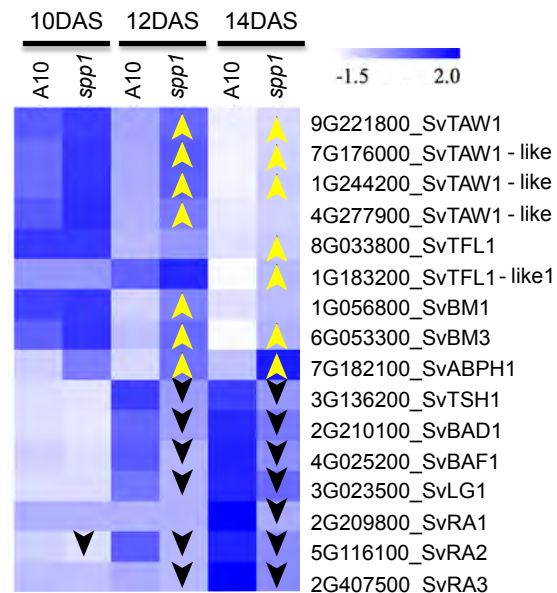

Figure 7. Differentially expressed genes in *spp1* inflorescences at 10, 12 and 14 DAS.

(A) Numbers of genes that are differentially expressed, upregulated or downregulated between wild type (A10.1) and *spp1* at each time point. (B) Expression of the five auxin influx carrier genes in *S. viridis* in wild type and *spp1* inflorescences. (C) Heat map comparing expression of selected auxin-pathway related genes in wild type (A10.1) and *spp1* inflorescences. (D) Heat map of selected differentially expressed genes involved in inflorescence branching. Yellow upward pointing arrows and black downward pointing arrows indicate upregulation and downregulation, respectively, compared to A10.1 at the same developmental stage.

## Figure 8

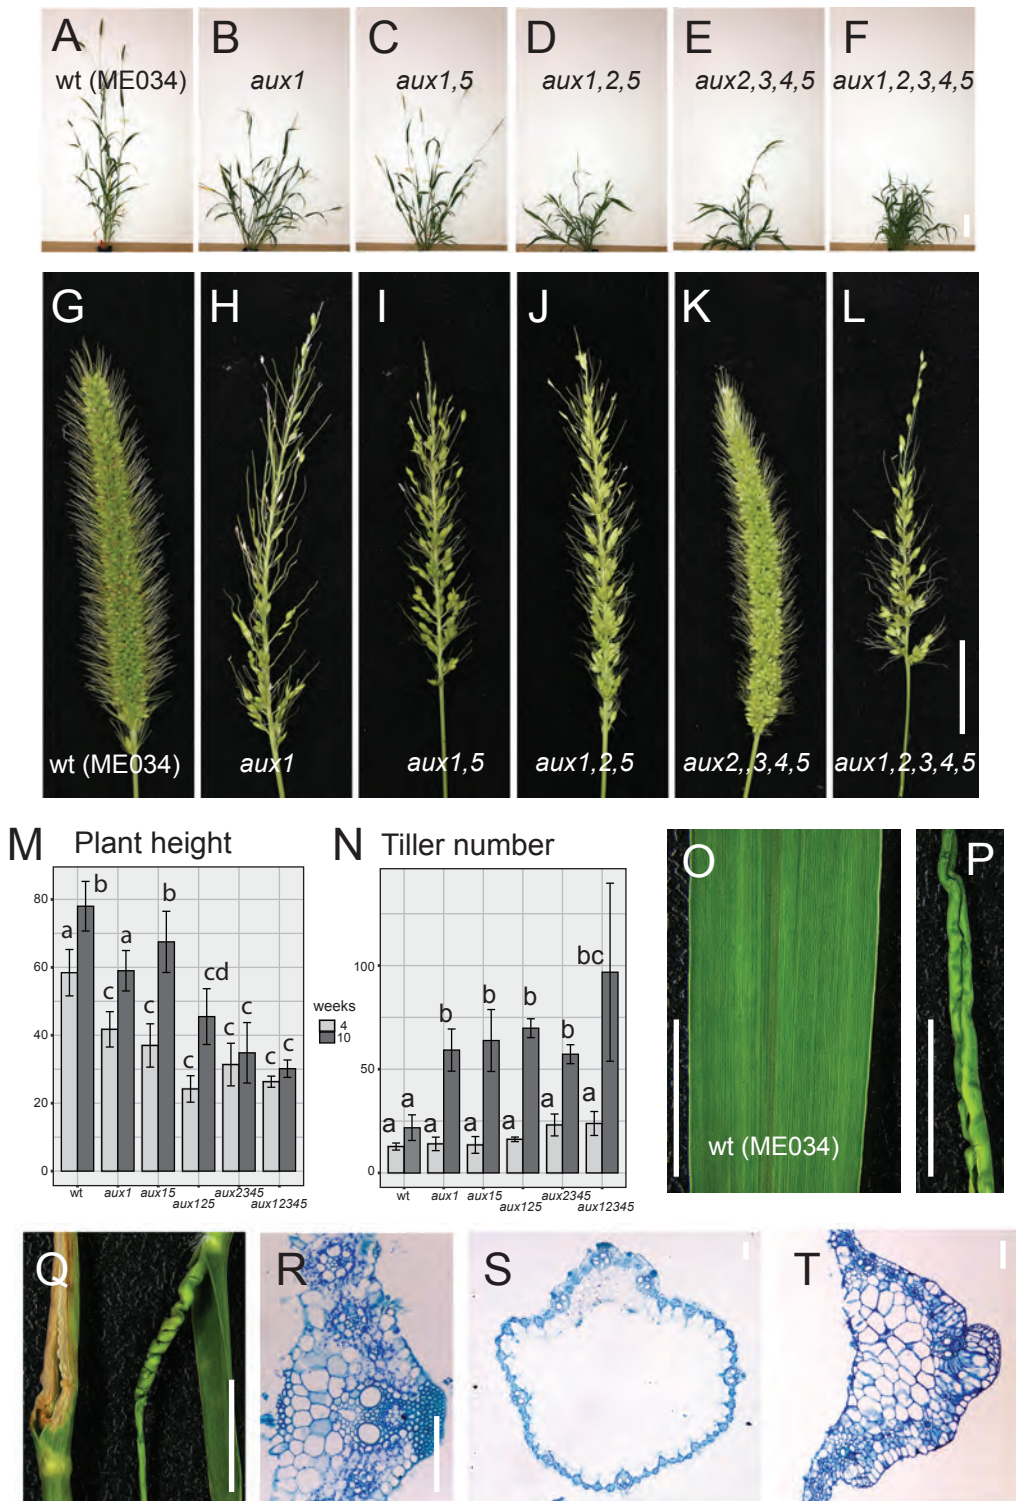

Figure 8. Auxin importer gene mutants in *S. viridis*. (A-F) Wild type and mutant plants photographed at 58 DAS, showing relative height and extent of tillering. (A) wild type (ME034V); (B) *aux1*; (C) *aux1,5*; (D) *aux1,2,5*; (E) *aux2,3,4,5*; (F) *aux1,2,3,4,5*. *aux1,3* not available for this set of photos. Scale = 10 cm. (G-L) Wild type and mutant inflorescences from the same plants and on the same day as in (A-F). Scale = 2 cm. (M) Plant height (mm) at the 4th (light gray) and 10th (dark gray) week after sowing. Error bars are standard deviations; values with the same letter are not significantly different by ANOVA. See also Table S10 for means, standard deviations, and p values. (N) Number of tillers on each plant at the 4th (light gray) and 10th (dark gray) week after sowing. Statistics as in (M). (O) Wild type ME034V (WT) leaf. Scale bar = 1 cm. (P, Q) Leaves in *aux1,2,5* or *aux1,2,3,4,5* mutants showing tube shape (P, right leaf in Q), early senescence in the tips (left leaf in Q), and twisted shape (right leaf in Q). Scale bar = 1 cm. (R-T) Leaf cross sections from WT (R), *aux1,2,5* (S) and *aux1,2,3,4,5* (T) mutants. Toluidine blue staining. Scale bar = 100  $\mu$ m.

## Parsed Citations

**Acharya BR, Roy Choudhury S, Estelle AB, Vijayakumar A, Zhu C, Hovis L, Pandey S (2017) Optimization of phenotyping assays for the model monocot *Setaria viridis*. *Front Plant Sci* 8: 2172**

Google Scholar: [Author Only](#) [Title Only](#) [Author and Title](#)

**Bai F, Reinheimer R, Durantini D, Kellogg EA, Schmidt RJ (2012) TCP transcription factor, *BRANCH ANGLE DEFECTIVE 1 (BAD1)*, is required for normal tassel branch angle formation in maize. *Proc Natl Acad Sci USA* 109: 12225–12233**

Google Scholar: [Author Only](#) [Title Only](#) [Author and Title](#)

**Bainbridge K, Guyomarc'h S, Bayer E, Swarup R, Bennett M, Mandel T, Kuhlemeier C (2008) Auxin influx carriers stabilize phyllotactic patterning. *Genes Dev* 22: 810–823**

Google Scholar: [Author Only](#) [Title Only](#) [Author and Title](#)

**Balzan S, Johal GS, Carraro N (2014) The role of auxin transporters in monocots development. *Front Plant Sci* 5: 393**

Google Scholar: [Author Only](#) [Title Only](#) [Author and Title](#)

**Bolger AM, Lohse M, Usadel B (2014) Trimmomatic: a flexible trimmer for Illumina sequence data. *Bioinformatics* 30: 2114–2120**

Google Scholar: [Author Only](#) [Title Only](#) [Author and Title](#)

**Bortiri E, Chuck G, Vollbrecht E, Rocheford T, Martienssen R, Hake S (2006) *ramosa2* encodes a *LATERAL ORGAN BOUNDARY* domain protein that determines the fate of stem cells in branch meristems of maize. *Plant Cell* 18: 574–585**

Google Scholar: [Author Only](#) [Title Only](#) [Author and Title](#)

**Cho WK, Hyun TK, Kumar D, Rim Y, Chen XY, Jo Y, Kim S, Lee KW, Park Z-Y, Lucas WJ, et al (2015) Proteomic analysis to identify tightly-bound cell wall protein in rice calli. *Molecules and Cells* 38: 685–696**

Google Scholar: [Author Only](#) [Title Only](#) [Author and Title](#)

**Chuck G, Whipple C, Jackson D, Hake S (2010) The maize SBP-box transcription factor encoded by *tasselsheath4* regulates bract development and the establishment of meristem boundaries. *Development* 137: 1243–1250**

Google Scholar: [Author Only](#) [Title Only](#) [Author and Title](#)

**Danilevskaia ON, Meng X, Ananiev EV (2010) Concerted modification of flowering time and inflorescence architecture by ectopic expression of TFL1-like genes in maize. *Plant Physiol* 153: 238–251**

Google Scholar: [Author Only](#) [Title Only](#) [Author and Title](#)

**Doust AN, Kellogg EA (2002) Inflorescence diversification in the panicoid "bristle grass" clade (Paniceae, Poaceae): evidence from molecular phylogenies and developmental morphology. *Am J Bot* 89: 1203–1222**

Google Scholar: [Author Only](#) [Title Only](#) [Author and Title](#)

**Figueiredo DD, Köhler C (2018) Auxin: a molecular trigger of seed development. *Genes Dev* 32: 479–490**

Google Scholar: [Author Only](#) [Title Only](#) [Author and Title](#)

**Gallavotti A (2013) The role of auxin in shaping shoot architecture. *J Exp Bot* 64: 2593–2608**

Google Scholar: [Author Only](#) [Title Only](#) [Author and Title](#)

**Gallavotti A, Malcomber S, Gaines C, Stanfield S, Whipple C, Kellogg E, Schmidt RJ (2011) *BARREN STALK FASTIGIATE1* is an AT-hook protein required for the formation of maize ears. *Plant Cell* 23: 1756–1771**

Google Scholar: [Author Only](#) [Title Only](#) [Author and Title](#)

**Gallavotti A, Zhao Q, Kyozuka J, Meeley RB, Ritter MK, Doebley JF, Pè ME, Schmidt RJ (2004) The role of *barren stalk1* in the architecture of maize. *Nature* 432: 630–635**

Google Scholar: [Author Only](#) [Title Only](#) [Author and Title](#)

**Galli M, Liu Q, Moss BL, Malcomber S, Li W, Gaines C, Federici S, Roshkovan J, Meeley R, Nemhauser JL, et al (2015) Auxin signaling modules regulate maize inflorescence architecture. *Proc Natl Acad Sci USA* 112: 13372–13377**

Google Scholar: [Author Only](#) [Title Only](#) [Author and Title](#)

**Grandjean O, Vernoux T, Laufs P, Belcram K, Mizukami Y, Traas J (2004) In vivo analysis of cell division, cell growth, and differentiation at the shoot apical meristem in *Arabidopsis*. *Plant Cell* 16: 74–87**

Google Scholar: [Author Only](#) [Title Only](#) [Author and Title](#)

**Halpin C, Holt K, Chojecki J, Oliver D, Chabbert B, Monties B, Edwards K, Barakate A, Foxon GA (1998) *Brown-midrib maize (bmr1)* -- a mutation affecting the cinnamyl alcohol dehydrogenase gene. *Plant J* 14: 545–553**

Google Scholar: [Author Only](#) [Title Only](#) [Author and Title](#)

**Hanano S, Goto K (2011) *Arabidopsis* *TERMINAL FLOWER1* is involved in the regulation of flowering time and inflorescence development through transcriptional repression. *The Plant Cell* 23: 3172–3184**

Google Scholar: [Author Only](#) [Title Only](#) [Author and Title](#)

**Heisler MG, Ohno C, Das P, Sieber P, Reddy GV, Long JA, Meyerowitz EM (2005) Patterns of auxin transport and gene expression during primordium development revealed by live imaging of the *Arabidopsis* inflorescence meristem. *Curr Biol* 15: 1899–1911**

Google Scholar: [Author Only](#) [Title Only](#) [Author and Title](#)



- Huang P, Jiang H, Zhu C, Barry K, Jenkins J, Sandor L, Schmutz J, Box MS, Kellogg EA, Brutnell TP (2017) Sparse panicle1 is required for inflorescence development in *Setaria viridis* and maize. *Nat Plants* 3: 17054  
Google Scholar: [Author Only Title Only Author and Title](#)
- Kleine-Vehn J, Dhonukshe P, Swarup R, Bennett M, Friml J (2006) Subcellular trafficking of the *Arabidopsis* auxin influx carrier AUX1 uses a novel pathway distinct from PIN1. *Plant Cell* 18: 3171–3181  
Google Scholar: [Author Only Title Only Author and Title](#)
- Komatsu K, Maekawa M, Ujiie S, Satake Y, Furutani I, Okamoto H, Shimamoto K, Kyojuka J (2003) LAX and SPA: major regulators of shoot branching in rice. *Proc Natl Acad Sci USA* 100: 11765–11770  
Google Scholar: [Author Only Title Only Author and Title](#)
- Korver RA, Koevoets IT, Testerink C (2018) Out of shape during stress: A key role for auxin. *Trends Plant Sci.* 23: 783-793  
Google Scholar: [Author Only Title Only Author and Title](#)
- Kubeš M, Yang H, Richter GL, Cheng Y, Młodzińska E, Wang X, Blakeslee JJ, Carraro N, Petrášek J, Zažímalová E, et al (2012) The *Arabidopsis* concentration-dependent influx/efflux transporter ABCB4 regulates cellular auxin levels in the root epidermis. *Plant J* 69: 640–654  
Google Scholar: [Author Only Title Only Author and Title](#)
- Kumar D, Kumar R, Baek D, Hyun TK, Chung WS (2017) *Arabidopsis thaliana* RECEPTOR DEAD KINASE1 functions as a positive regulator in plant responses to ABA. *Mol. Plant* 10: 223-243  
Google Scholar: [Author Only Title Only Author and Title](#)
- Langfelder P, Horvath S (2008) WGCNA: an R package for weighted correlation network analysis. *BMC Bioinformatics* 9: 559  
Google Scholar: [Author Only Title Only Author and Title](#)
- Langfelder P, Luo R, Oldham MC, Horvath S (2011) Is my network module preserved and reproducible? *PLoS Comput Biol* 7: e1001057
- Langmead B, Salzberg SL (2012) Fast gapped-read alignment with Bowtie 2. *Nat Methods* 9: 357–359  
Google Scholar: [Author Only Title Only Author and Title](#)
- Lee B-H, Johnston R, Yang Y, Gallavotti A, Kojima M, Travençolo BAN, Costa L da F, Sakakibara H, Jackson D (2009) Studies of aberrant *phyllotaxy1* mutants of maize indicate complex interactions between auxin and cytokinin signaling in the shoot apical meristem. *Plant Physiol* 150: 205–216  
Google Scholar: [Author Only Title Only Author and Title](#)
- Lewis MW, Bolduc N, Hake K, Htike Y, Hay A, Candela H, Hake S (2014) Gene regulatory interactions at lateral organ boundaries in maize. *Development* 141: 4590–4597  
Google Scholar: [Author Only Title Only Author and Title](#)
- Li P, Ponnala L, Gandotra N, Wang L, Si Y, Tausta SL, Kebrom TH, Provart N, Patel R, Myers CR, et al (2010) The developmental dynamics of the maize leaf transcriptome. *Nat Genet* 42: 1060–1067  
Google Scholar: [Author Only Title Only Author and Title](#)
- Marchant A (1999) AUX1 regulates root gravitropism in *Arabidopsis* by facilitating auxin uptake within root apical tissues. *EMBO J* 18: 2066–2073  
Google Scholar: [Author Only Title Only Author and Title](#)
- McSteen P, Hake S (2001) barren inflorescence2 regulates axillary meristem development in the maize inflorescence. *Development* 128: 2881–2891  
Google Scholar: [Author Only Title Only Author and Title](#)
- McSteen P, Malcomber S, Skirpan A, Lunde C, Wu X, Kellogg E, Hake S (2007) barren inflorescence2 encodes a co-ortholog of the PINOID serine/threonine kinase and is required for organogenesis during inflorescence and vegetative development in maize. *Plant Physiol* 144: 1000–1011  
Google Scholar: [Author Only Title Only Author and Title](#)
- Moreno MA, Harper LC, Krueger RW, Dellaporta SL, Freeling M (1997) *liguleless1* encodes a nuclear-localized protein required for induction of ligules and auricles during maize leaf organogenesis. *Genes Dev* 11: 616–628  
Google Scholar: [Author Only Title Only Author and Title](#)
- Nakagawa M, Shimamoto K, Kyojuka J (2002) Overexpression of RCN1 and RCN2, rice TERMINAL FLOWER 1/CENTRORADIALIS homologs, confers delay of phase transition and altered panicle morphology in rice. *Plant J* 29: 743–750  
Google Scholar: [Author Only Title Only Author and Title](#)
- Naramoto S (2017) Polar transport in plants mediated by membrane transporters: focus on mechanisms of polar auxin transport. *Curr Opin Plant Biol* 40: 8–14  
Google Scholar: [Author Only Title Only Author and Title](#)
- O'Connor DL, Runions A, Sluis A, Bragg J, Vogel JP, Prusinkiewicz P, Hake S (2014) A division in PIN-mediated auxin patterning during organ initiation in grasses. *PLoS Comput Biol* 10: e1003447  
Google Scholar: [Author Only Title Only Author and Title](#)

- Olatunji D, Geelen D, Verstraeten I (2017) Control of endogenous auxin levels in plant root development. *Int J Mol Sci.* 18: 2587**  
Google Scholar: [Author Only Title Only Author and Title](#)
- Pedersen JF, Vogel KP, Funnell DL (2005) Impact of reduced lignin on plant fitness. *Papers in Plant Pathology* 32**  
Google Scholar: [Author Only Title Only Author and Title](#)
- Peret B, Swarup K, Ferguson A, Seth M, Yang Y, Dhondt S, James N, Casimiro I, Perry P, Syed A, et al (2012) AUX/LAX genes encode a family of auxin influx transporters that perform distinct functions during Arabidopsis development. *Plant Cell* 24: 2874–2885**  
Google Scholar: [Author Only Title Only Author and Title](#)
- Petrásek J, Mravec J, Bouchard R, Blakeslee JJ, Abas M, Seifertová D, Wisniewska J, Tadele Z, Kubes M, Covanová M, et al (2006) PIN proteins perform a rate-limiting function in cellular auxin efflux. *Science* 312: 914–918**  
Google Scholar: [Author Only Title Only Author and Title](#)
- Phillips KA, Skirpan AL, Liu X, Christensen A, Slewinski TL, Hudson C, Barazesh S, Cohen JD, Malcomber S, McSteen P (2011) vanishing tassel2 encodes a grass-specific tryptophan aminotransferase required for vegetative and reproductive development in maize. *Plant Cell* 23: 550–566**  
Google Scholar: [Author Only Title Only Author and Title](#)
- Pressoir G, Brown PJ, Zhu W, Upadyayula N, Rocheford T, Buckler ES, Kresovich S (2009) Natural variation in maize architecture is mediated by allelic differences at the PINOID co-ortholog barren inflorescence2. *Plant J* 58: 618–628**  
Google Scholar: [Author Only Title Only Author and Title](#)
- R Core Team (2020). R: A language and environment for statistical computing. R Foundation for Statistical Computing, Vienna, Austria. URL <https://www.R-project.org/>.**  
Google Scholar: [Author Only Title Only Author and Title](#)
- Robert HS, Crhak K, Kaitova L, Mroue S, Benková E (2015) The importance of localized auxin production for morphogenesis of reproductive organs and embryos in Arabidopsis. *J Exp Bot* 66: 5029–5042**  
Google Scholar: [Author Only Title Only Author and Title](#)
- Satoh-Nagasawa N, Nagasawa N, Malcomber S, Sakai H, Jackson D (2006) A trehalose metabolic enzyme controls inflorescence architecture in maize. *Nature* 441: 227–230**  
Google Scholar: [Author Only Title Only Author and Title](#)
- Schmittgen TD, Livak KJ (2008) Analyzing real-time PCR data by the comparative C(T) method. *Nat Protoc* 3: 1101–1108**  
Google Scholar: [Author Only Title Only Author and Title](#)
- Schneider CA, Rasband WS, Eliceiri KW (2012) NIH Image to ImageJ: 25 years of image analysis. *Nat Methods* 9: 671–675**  
Google Scholar: [Author Only Title Only Author and Title](#)
- van der Schuren A, Voiniciuc C, Bragg J, Ljung K, Vogel J, Pauly M, Hardtke CS (2018) Broad spectrum developmental role of Brachypodium AUX1. *New Phytol.* 219: 1216–1233**  
Google Scholar: [Author Only Title Only Author and Title](#)
- Skirpan A, Culler AH, Gallavotti A, Jackson D, Cohen JD, McSteen P (2009) BARREN INFLORESCENCE2 interaction with ZmPIN1a suggests a role in auxin transport during maize inflorescence development. *Plant Cell Physiol* 50: 652–657**  
Google Scholar: [Author Only Title Only Author and Title](#)
- Stam M, Mol JNM, Kooter JM (1997) The silence of genes in transgenic plants. *Ann Bot* 79: 3–12**  
Google Scholar: [Author Only Title Only Author and Title](#)
- Swarup R, Bhosale R (2019) Developmental roles of AUX1/LAX auxin influx carriers in plants. *Front Plant Sci* 10: 1306**  
Google Scholar: [Author Only Title Only Author and Title](#)
- Swarup R, Kargul J, Marchant A, Zadik D, Rahman A, Mills R, Yemm A, May S, Williams L, Millner P, et al (2004) Structure-function analysis of the presumptive Arabidopsis auxin permease AUX1. *Plant Cell* 16: 3069–3083**  
Google Scholar: [Author Only Title Only Author and Title](#)
- Swarup R, Péret B (2012) AUX/LAX family of auxin influx carriers-an overview. *Front Plant Sci.* 3: 225**  
Google Scholar: [Author Only Title Only Author and Title](#)
- Taylor-Teeples M, Lanctot A, Nemhauser JL (2016) As above, so below: Auxin's role in lateral organ development. *Dev Biol* 419: 156–164**  
Google Scholar: [Author Only Title Only Author and Title](#)
- Trapnell C, Roberts A, Goff L, Pertea G, Kim D, Kelley DR, Pimentel H, Salzberg SL, Rinn JL, Pachter L (2012) Differential gene and transcript expression analysis of RNA-seq experiments with TopHat and Cufflinks. *Nat Protoc* 7: 562–578**  
Google Scholar: [Author Only Title Only Author and Title](#)
- Tsiantis M, Brown MI, Skibinski G, Langdale JA (1999) Disruption of auxin transport is associated with aberrant leaf development in maize. *Plant Physiol* 121: 1163–1168**  
Google Scholar: [Author Only Title Only Author and Title](#)

- Verna C, Ravichandran SJ, Sawchuk MG, Linh NM, Scarpella E (2019) Coordination of tissue cell polarity by auxin transport and signaling. *Elife* 8: e51061  
Google Scholar: [Author Only](#) [Title Only](#) [Author and Title](#)
- Vignols F, Rigau J, Torres MA, Capellades M, Puigdomènech P (1995) The brown midrib3 (bm3) mutation in maize occurs in the gene encoding caffeic acid O-methyltransferase. *Plant Cell* 7: 407–416  
Google Scholar: [Author Only](#) [Title Only](#) [Author and Title](#)
- Vollbrecht E, Springer PS, Goh L, Buckler ES IV, Martienssen R (2005) Architecture of floral branch systems in maize and related grasses. *Nature* 436: 1119–1126  
Google Scholar: [Author Only](#) [Title Only](#) [Author and Title](#)
- Wang L, Yin H, Qian Q, Yang J, Huang C, Hu X, Luo D (2009) NECK LEAF1, a GATA type transcription factor, modulates organogenesis by regulating the expression of multiple regulatory genes during reproductive development in rice. *Cell Res* 19: 598–611  
Google Scholar: [Author Only](#) [Title Only](#) [Author and Title](#)
- Wang Y, Jiao Y (2018) Auxin and above-ground meristems. *J Exp Bot* 69: 147–154  
Google Scholar: [Author Only](#) [Title Only](#) [Author and Title](#)
- Werner S, Engler C, Weber E, Gruetzner R, Marillonnet S (2012) Fast track assembly of multigene constructs using Golden Gate cloning and the MoClo system. *Bioeng Bugs* 3: 38–43  
Google Scholar: [Author Only](#) [Title Only](#) [Author and Title](#)
- Whipple CJ (2017) Grass inflorescence architecture and evolution: the origin of novel signaling centers. *New Phytol* 216: 367–372  
Google Scholar: [Author Only](#) [Title Only](#) [Author and Title](#)
- Whipple CJ, Hall DH, DeBlasio S, Taguchi-Shiobara F, Schmidt RJ, Jackson DP (2010) A conserved mechanism of bract suppression in the grass family. *Plant Cell* 22: 565–578  
Google Scholar: [Author Only](#) [Title Only](#) [Author and Title](#)
- Wimalanathan K, Lawrence-Dill CJ (2021) Gene Ontology Meta Annotator for Plants (GOMAP). *Plant Methods* 17: 54  
Google Scholar: [Author Only](#) [Title Only](#) [Author and Title](#)
- Wu T, Hu E, Xu S, Chen M, Guo P, Dai Z, Feng T, Zhou L, Tang W, Zhan L, et al (2021) clusterProfiler 4.0: A universal enrichment tool for interpreting omics data. *The Innovation* 2: 100141  
Google Scholar: [Author Only](#) [Title Only](#) [Author and Title](#)
- Yoshida A, Sasao M, Yasuno N, Takagi K, Daimon Y, Chen R, Yamazaki R, Tokunaga H, Kitaguchi Y, Sato Y, et al (2013) TAWAWA1, a regulator of rice inflorescence architecture, functions through the suppression of meristem phase transition. *Proc Natl Acad Sci USA* 110: 767–772  
Google Scholar: [Author Only](#) [Title Only](#) [Author and Title](#)
- Yu C, Sun C, Shen C, Wang S, Liu F, Liu Y, Chen Y, Li C, Qian Q, Aryal B, et al (2015) The auxin transporter, OsAUX1, is involved in primary root and root hair elongation and in Cd stress responses in rice (*Oryza sativa* L.). *Plant J* 83: 818–830  
Google Scholar: [Author Only](#) [Title Only](#) [Author and Title](#)
- Yuo T, Yamashita Y, Kanamori H, Matsumoto T, Lundqvist U, Sato K, Ichii M, Jobling SA, Taketa S (2012) A SHORT INTERNODES (SHI) family transcription factor gene regulates awn elongation and pistil morphology in barley. *J Exp Bot* 63: 5223–5232  
Google Scholar: [Author Only](#) [Title Only](#) [Author and Title](#)
- Yu Y, Hu H, Doust AN, Kellogg EA (2020) Divergent gene expression networks underlie morphological diversity of abscission zones in grasses. *New Phytol* 225: 1799–1815  
Google Scholar: [Author Only](#) [Title Only](#) [Author and Title](#)
- Zhang D, Sun W, Singh R, Zheng Y, Cao Z, Li M, Lunde C, Hake S, Zhang Z (2018) GRF-interacting Factor1 regulates shoot architecture and meristem determinacy in maize. *Plant Cell* 30: 360–374  
Google Scholar: [Author Only](#) [Title Only](#) [Author and Title](#)
- Zhao H, Ma T, Wang X, Deng Y, Ma H, Zhang R, Zhao J (2015) OsAUX1 controls lateral root initiation in rice (*Oryza sativa* L.). *Plant Cell Environ* 38: 2208–2222  
Google Scholar: [Author Only](#) [Title Only](#) [Author and Title](#)
- Zhu C, Yang J, Box MS, Kellogg EA, Eveland AL (2018) A dynamic co-expression map of early inflorescence development in *Setaria viridis* provides a resource for gene discovery and comparative genomics. *Front Plant Sci* 9: 1309  
Google Scholar: [Author Only](#) [Title Only](#) [Author and Title](#)
- Zhu C, Yang J, Shyu C (2017) *Setaria* comes of age: meeting report on the Second International *Setaria* Genetics Conference. *Front Plant Sci* 8: 1562  
Google Scholar: [Author Only](#) [Title Only](#) [Author and Title](#)
